# Supplementary material for: One-pot synthesis of symmetric 1,7-dicarbonyl compounds via a tandem radical addition–elimination–addition reaction
Source: Royal Society of Chemistry journal article supplement (doi:10.1039/c3ra42932f), 2013-01-01

# One-Pot Synthesis of Symmetric 1,7-Dicarbonyl Compounds Via a Tandem Radical Addition - Elimination – Addition Reaction

Zhongyan Huang and Jiayi Xu\*

State Key Laboratory of Chemical Resource Engineering, Department of Organic Chemistry,  
Faculty of Science, Beijing University of Chemical Technology, Beijing 100029, China.

Fax: (+86)10-64435565

E-mail: jxxu@mail.buct.edu.cn

|                                                                                                                                       |     |
|---------------------------------------------------------------------------------------------------------------------------------------|-----|
| Contents .....                                                                                                                        | S1  |
| Analytic data of known <i>O</i> -ethyl <i>S</i> -carbonylmethyl xanthates <b>1</b> and allyl sulfur compounds <b>2</b> .....          | S2  |
| Copies of <sup>1</sup> H and <sup>13</sup> C NMR spectra of unknown <i>O</i> -ethyl <i>S</i> -carbonylmethyl xanthates <b>1</b> ..... | S5  |
| Copies of <sup>1</sup> H and <sup>13</sup> C NMR spectra of unknown allylbutylsulfoxide <b>2d</b> .....                               | S10 |
| Copies of <sup>1</sup> H and <sup>13</sup> C NMR spectra of symmetric 1,7-dicarbonyl compounds <b>3</b> .....                         | S11 |

## Analytic data of known *O*-ethyl *S*-carbonylmethyl xanthates 1 and allyl sulfur compounds 2

### ***O*-Ethyl *S*-[2-phenyl-2-oxoethyl] carbonodithioate (1a).**

Pale yellow solid, yield: 1.08 g, 90%, m.p. 32–33 °C, Lit.<sup>1</sup> m.p. 31–32 °C. <sup>1</sup>H NMR (CDCl<sub>3</sub>, 400 MHz) (δ, ppm) 1.39 (t, *J* = 7.1 Hz, 3H, CH<sub>3</sub>), 4.63 (q, *J* = 7.1 Hz, 2H, CH<sub>2</sub>), 4.66 (s, 2H, CH<sub>2</sub>), 7.50 (t, *J* = 7.6 Hz, 2H, ArH), 7.61 (t, *J* = 7.6 Hz, 1H, ArH), 8.01 (d, *J* = 7.6 Hz, 2H, ArH). <sup>13</sup>C NMR (CDCl<sub>3</sub>, 100 MHz) (δ, ppm) 13.6 (CH<sub>3</sub>), 43.5 (CH<sub>2</sub>), 70.6 (CH<sub>2</sub>), 128.4 (CH), 128.7 (CH), 133.7 (CH), 135.7 (CH), 166.4 (C), 192.2 (C=O), 213.2 (C=S).

### ***O*-Ethyl *S*-[2-(4-methoxyphenyl)-2-oxoethyl] carbonodithioate (1b).**

Pale yellow solid, yield: 1.20 g, 89%, m.p. 69–70 °C, Lit.<sup>1</sup> m.p. 68–69 °C. <sup>1</sup>H NMR (CDCl<sub>3</sub>, 400 MHz) (δ, ppm) 1.40 (t, *J* = 7.1 Hz, 3H, CH<sub>3</sub>), 3.88 (s, 3H, CH<sub>3</sub>), 4.62 (s, 2H, CH<sub>2</sub>), 4.64 (q, *J* = 7.1 Hz, 2H, CH<sub>2</sub>), 7.50 (d, *J* = 8.6 Hz, 2H, ArH), 8.01 (d, *J* = 8.6 Hz, 2H, ArH). <sup>13</sup>C NMR (CDCl<sub>3</sub>, 100 MHz) (δ, ppm) 13.6 (CH<sub>3</sub>), 43.1 (CH<sub>2</sub>), 55.2 (CH<sub>3</sub>), 70.2 (CH<sub>2</sub>), 113.6 (CH), 128.5 (C), 130.4 (CH), 163.7 (C), 190.3 (C=O), 213.2 (C=S).

### ***O*-Ethyl *S*-(2-oxopropyl) carbonodithioate (1c).<sup>2</sup>**

Pale yellow liquid, yield: 0.81 g, 91%. <sup>1</sup>H NMR (CDCl<sub>3</sub>, 400 MHz) (δ, ppm) 1.39 (t, *J* = 7.1 Hz, 3H, CH<sub>3</sub>), 2.30 (s, 3H, CH<sub>3</sub>), 3.97 (s, 2H, CH<sub>2</sub>), 4.67 (q, *J* = 7.1 Hz, 2H, CH<sub>2</sub>). <sup>13</sup>C NMR (CDCl<sub>3</sub>, 100 MHz) (δ, ppm) 13.7 (CH<sub>3</sub>), 29.1 (CH<sub>3</sub>), 45.9 (CH<sub>2</sub>), 70.6 (CH<sub>2</sub>), 200.8 (C=O), 212.9 (C=S).

### ***S*-(3-Chloro-2-oxopropyl) *O*-ethyl carbonodithioate (1d).**

White solid 1.12 g, yield: 70%, m.p. 52–53 °C, Lit.<sup>3</sup> 49–50 °C. <sup>1</sup>H NMR (400 MHz, CDCl<sub>3</sub>) (δ, ppm) 1.43 (t, *J* = 7.1 Hz, 3H, CH<sub>3</sub>), 4.15 (s, 2H, CH<sub>2</sub>), 4.30 (s, 2H, CH<sub>2</sub>), 4.64 (q, *J* = 7.1 Hz, 2H, CH<sub>2</sub>). <sup>13</sup>C NMR (CDCl<sub>3</sub>, 100 MHz) (δ, ppm) 13.6, 42.8, 47.8, 71.2, 195.6, 212.7.

### ***S*-(2-Ethoxyl-2-oxoethyl) *O*-ethyl carbonodithioate (1e).<sup>4</sup>**

Pale yellow liquid, yield: 0.92 g, 88%. <sup>1</sup>H NMR (CDCl<sub>3</sub>, 400 MHz) (δ, ppm) 1.29 (t, *J* = 7.1 Hz, 3H, CH<sub>3</sub>), 1.42 (t, *J* = 7.1 Hz, 3H, CH<sub>3</sub>), 3.92 (s, 2H, CH<sub>2</sub>), 4.22 (q, *J* = 7.1 Hz, 2H, CH<sub>2</sub>), 4.64 (q, *J* = 7.1 Hz, 2H, CH<sub>2</sub>). <sup>13</sup>C NMR (CDCl<sub>3</sub>, 100 MHz) (δ, ppm) 13.6 (CH<sub>3</sub>), 14.1 (CH<sub>3</sub>), 37.8 (CH<sub>2</sub>), 61.8 (CH<sub>2</sub>), 70.5 (CH<sub>2</sub>), 167.8 (C=O), 212.5 (C=S).

### ***O*-Ethyl *S*-(2-phenoxy-2-oxoethyl) carbonodithioate (1f).<sup>5</sup>**

Pale yellow liquid, yield: 1.18 g, 92%. <sup>1</sup>H NMR (CDCl<sub>3</sub>, 400 MHz) (δ, ppm) 1.43 (t, *J* = 7.1 Hz, 3H, CH<sub>3</sub>), 4.13 (s, 2H, CH<sub>2</sub>), 4.67 (q, *J* = 7.1 Hz, 2H, CH<sub>2</sub>), 7.11 (d, *J* = 7.6 Hz, 2H, ArH), 7.23 (t, *J* = 7.6 Hz, 2H, ArH), 7.38 (t, *J* = 7.6 Hz, 2H, ArH). <sup>13</sup>C NMR (CDCl<sub>3</sub>, 100 MHz) (δ, ppm) 13.6 (CH<sub>3</sub>), 37.9 (CH<sub>2</sub>), 70.8 (CH<sub>2</sub>), 121.2 (CH), 126.1 (CH), 129.4 (CH), 150.6 (C), 166.5 (C=O), 212.3 (C=S).

### ***O*-Ethyl *S*-[2-oxo-2-(oxazolidin-2-on-3-yl)ethyl] carbonodithioate (1l).**

Pale yellow solid, yield: 1.11 g, 89%, m.p. 100–101 °C, Lit.<sup>6</sup> m.p. 96 °C. <sup>1</sup>H NMR (CDCl<sub>3</sub>, 400

MHz) ( $\delta$ , ppm) 1.43 (t,  $J = 7.1$  Hz, 3H, CH<sub>3</sub>), 4.07 (t,  $J = 8.0$  Hz, 2H, CH<sub>2</sub>), 4.49 (t,  $J = 8.1$  Hz, 2H, CH<sub>2</sub>), 4.57 (s, 2H, CH<sub>2</sub>), 4.65 (q,  $J = 7.1$  Hz, 2H, CH<sub>2</sub>). <sup>13</sup>C NMR (CDCl<sub>3</sub>, 100 MHz) ( $\delta$ , ppm) 13.6 (CH<sub>3</sub>), 39.3 (CH<sub>2</sub>), 42.6 (CH<sub>2</sub>), 62.4 (CH<sub>2</sub>), 70.6 (CH<sub>2</sub>), 153.4 (C=O), 166.7 (C=O), 212.7 (C=S).

**S-(Cyanomethyl) O-ethyl carbonodithioate (1m).**<sup>7</sup>

Pale yellow liquid, yield: 0.71 g, 88%. <sup>1</sup>H NMR (CDCl<sub>3</sub>, 400 MHz) ( $\delta$ , ppm) 1.47 (t,  $J = 7.1$  Hz, 3H, CH<sub>3</sub>), 3.89 (s, 2H, CH<sub>2</sub>), 4.72 (q,  $J = 7.1$  Hz, 2H, CH<sub>2</sub>). <sup>13</sup>C NMR (CDCl<sub>3</sub>, 100 MHz) ( $\delta$ , ppm) 13.6 (CH<sub>3</sub>), 21.3 (CH<sub>2</sub>), 71.5 (CH<sub>2</sub>), 115.2 (CN), 208.9 (C=S).

**Allyl methylsulfone (2a).**<sup>8</sup>

Colorless liquid, yield: 10.5 g, 87%. <sup>1</sup>H NMR (CDCl<sub>3</sub>, 400 MHz) ( $\delta$ , ppm) 2.87 (s, 3H, CH<sub>3</sub>), 3.74 (d,  $J = 7.6$  Hz, 2H, CH<sub>2</sub>), 5.48 (d,  $J = 17.2$  Hz, 1H in CH<sub>2</sub>), 5.52 (d,  $J = 10.2$  Hz, 1H in CH<sub>2</sub>), 5.92-6.02 (m, 1H, CH). <sup>13</sup>C NMR (CDCl<sub>3</sub>, 100 MHz) ( $\delta$ , ppm) 38.9 (CH<sub>3</sub>), 59.3 (CH<sub>2</sub>), 124.6 (CH<sub>2</sub>), 125.2 (CH).

**Allyl ethylsulfone (2b).**<sup>9</sup>

Colorless liquid, from sodium ethanesulphinate (2.50 g, 21.5 mmol), yield: 1.75 g, 60%. <sup>1</sup>H NMR (CDCl<sub>3</sub>, 400 MHz) ( $\delta$ , ppm) 1.39 (t,  $J = 7.1$  Hz, 3H, CH<sub>3</sub>), 3.00 (q,  $J = 7.1$  Hz, 2H, CH<sub>2</sub>), 3.71 (d,  $J = 7.6$  Hz, 2H, CH<sub>2</sub>), 5.43-5.51 (m, 2H, CH<sub>2</sub>), 5.95 (ddt,  $J = 14.4, 10.4, 7.6$  Hz, 1H, CH). <sup>13</sup>C NMR (CDCl<sub>3</sub>, 100 MHz) ( $\delta$ , ppm) 6.4 (CH<sub>3</sub>), 45.6 (CH<sub>2</sub>), 56.8 (CH<sub>2</sub>), 124.3 (CH<sub>2</sub>), 125.1 (CH).

**Allyl phenylsulfone (2c).**<sup>10</sup>

Colorless liquid, yield: 15.6 g, 85%. <sup>1</sup>H NMR (CDCl<sub>3</sub>, 400 MHz) ( $\delta$ , ppm) 3.81 (d,  $J = 7.6$  Hz, 2H, CH<sub>2</sub>), 5.15 (d,  $J = 17.2$  Hz, 1H in CH<sub>2</sub>), 5.33 (d,  $J = 10.0$  Hz, 1H in CH<sub>2</sub>), 5.74-5.84 (m, 1H, CH), 7.56 (t,  $J = 7.6$  Hz, 2H, ArH), 7.65 (t,  $J = 7.6$  Hz, 1H, ArH), 7.88 (d,  $J = 7.6$  Hz, 2H, ArH). <sup>13</sup>C NMR (CDCl<sub>3</sub>, 100 MHz) ( $\delta$ , ppm) 60.8 (CH<sub>2</sub>), 124.5 (CH), 124.6 (CH<sub>2</sub>), 128.4 (CH), 129.0 (CH), 133.7 (CH), 138.2 (C).

**Allyl phenylsulfoxide (2e).**<sup>11</sup>

Colorless liquid, yield: 0.83 g, 50%. <sup>1</sup>H NMR (CDCl<sub>3</sub>, 400 MHz) ( $\delta$ , ppm) 3.52 (dd,  $J = 12.8, 7.6$  Hz, 1H in CH<sub>2</sub>), 3.58 (dd,  $J = 12.8, 7.6$  Hz, 1H in CH<sub>2</sub>), 5.16 (d,  $J = 17.2$  Hz, 1H in CH<sub>2</sub>), 5.20 (d,  $J = 10.0$  Hz, 1H in CH<sub>2</sub>), 5.59-5.70 (m, 1H, CH), 7.51-7.67 (m, 4H, ArH), 7.87 (d,  $J = 7.6$  Hz, 1H, ArH). <sup>13</sup>C NMR (CDCl<sub>3</sub>, 100 MHz) ( $\delta$ , ppm) 60.8 (CH<sub>2</sub>), 123.8 (CH), 124.6 (CH<sub>2</sub>), 125.1 (CH), 128.4 (CH), 131.0 (CH), 142.7 (C).

**References**

- 1 B. Batanero, O. Picazo and E. Barba, *J. Org. Chem.* **2001**, *66*, 320-322.
- 2 V. Liautard, F. Robert and Y. Landais, *Org. Lett.* **2011**, *13*, 2658-2661.
- 3 M. De Greef and S. Z. Zard, *Org. Lett.* **2007**, *9*, 1773-1776.
- 4 A. Kapat, E. Nyfeler, G. Giuffredi and P. Renaud, *J. Am. Chem. Soc.* **2009**, *131*, 17746-17747.
- 5 E. Godineau and Y. Landais, *J. Am. Chem. Soc.* **2007**, *129*, 12662-12663.
- 6 E. Bacqué, F. Pautrat and S. Z. Zard, *Chem. Commun.* **2002**, 2312-2313.

- 7 S. Kakaei, N. Chen and J. X. Xu, *Tetrahedron* **2013**, *69*, 302–309.
- 8 G. C. Tsui and M. Lautens, *Angew. Chem., Int. Ed.* **2010**, *49*, 8938–8941.
- 9 R. J. Palmer and C. J. M. Stirling, *J. Am. Chem. Soc.* **1980**, *102*, 7888–7892.
- 10 G. A. Russell and L. L. Herold, *J. Org. Chem.* **1985**, *50*, 1037–1040.
- 11 K. Bahrami, M. M. Khodaei and M. Sheikh Arabi, *J. Org. Chem.* **2010**, *75*, 6208–6213.

## Copies of $^1\text{H}$ and $^{13}\text{C}$ NMR spectra of unknown *O*-ethyl *S*-carbonylmethyl xanthates 1

### *S*-[2-(4-Chlorophenoxy)-2-oxoethyl] *O*-ethyl carbonodithioate (1g)

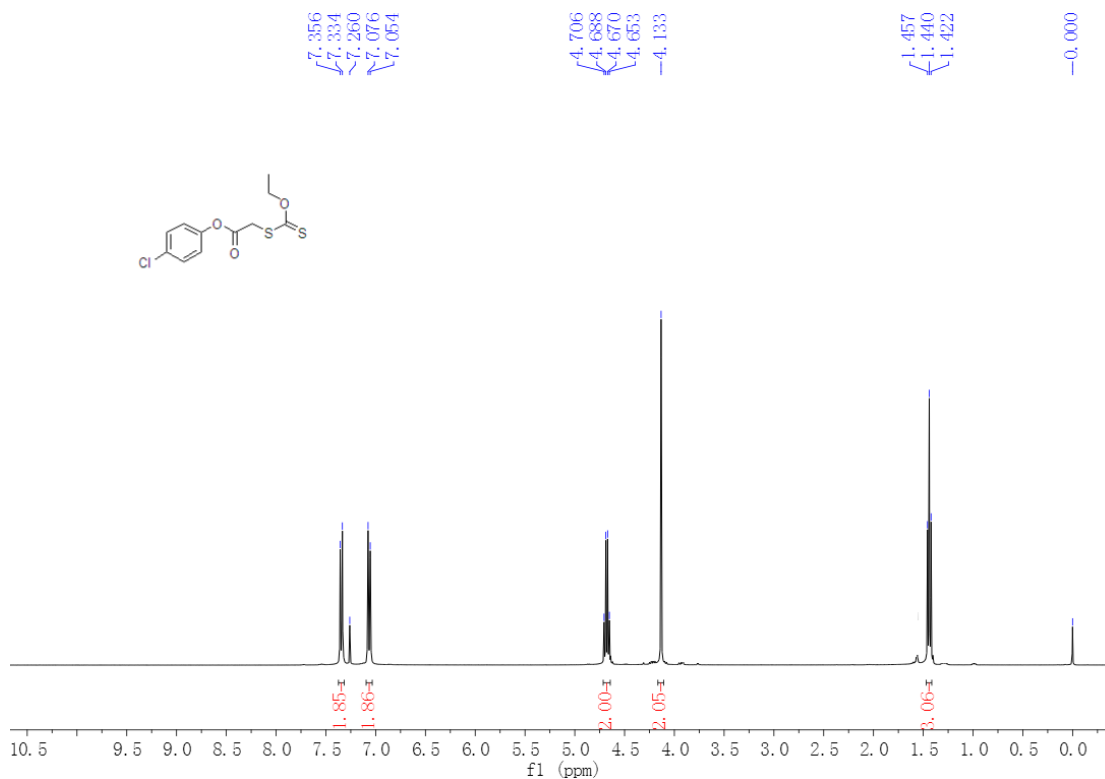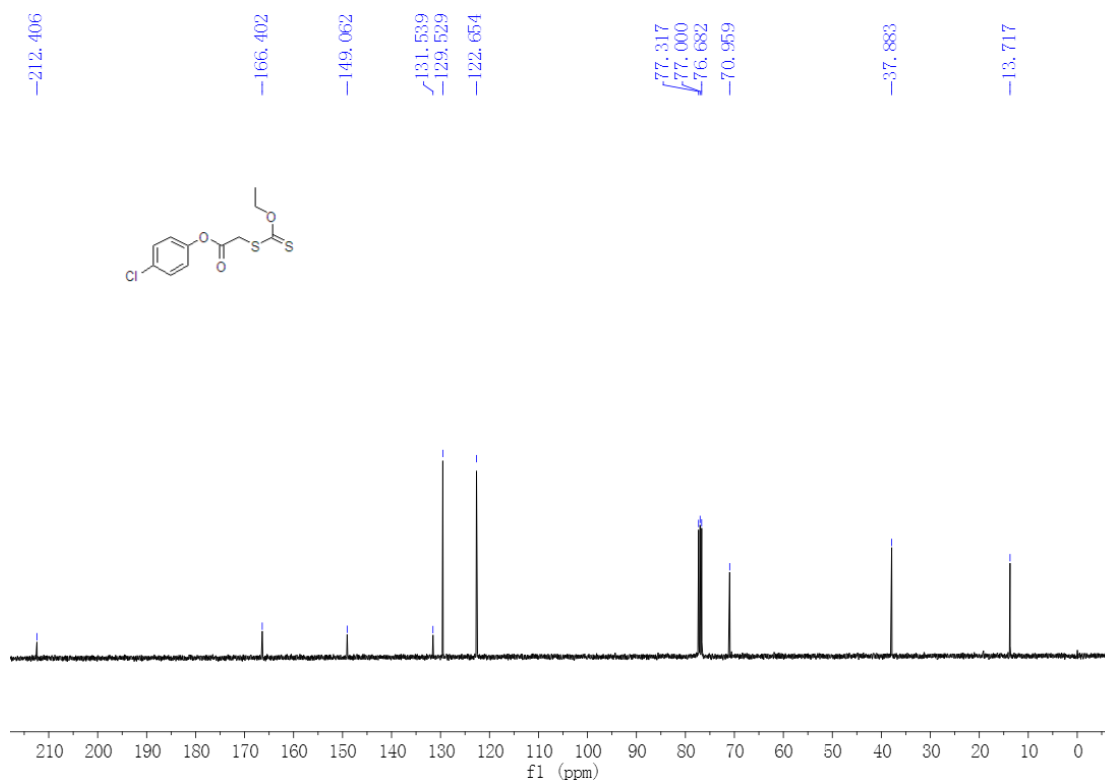

***O*-Ethyl *S*-[2-(4-nitrophenoxy)-2-oxoethyl] carbonodithioate (**1h**)**

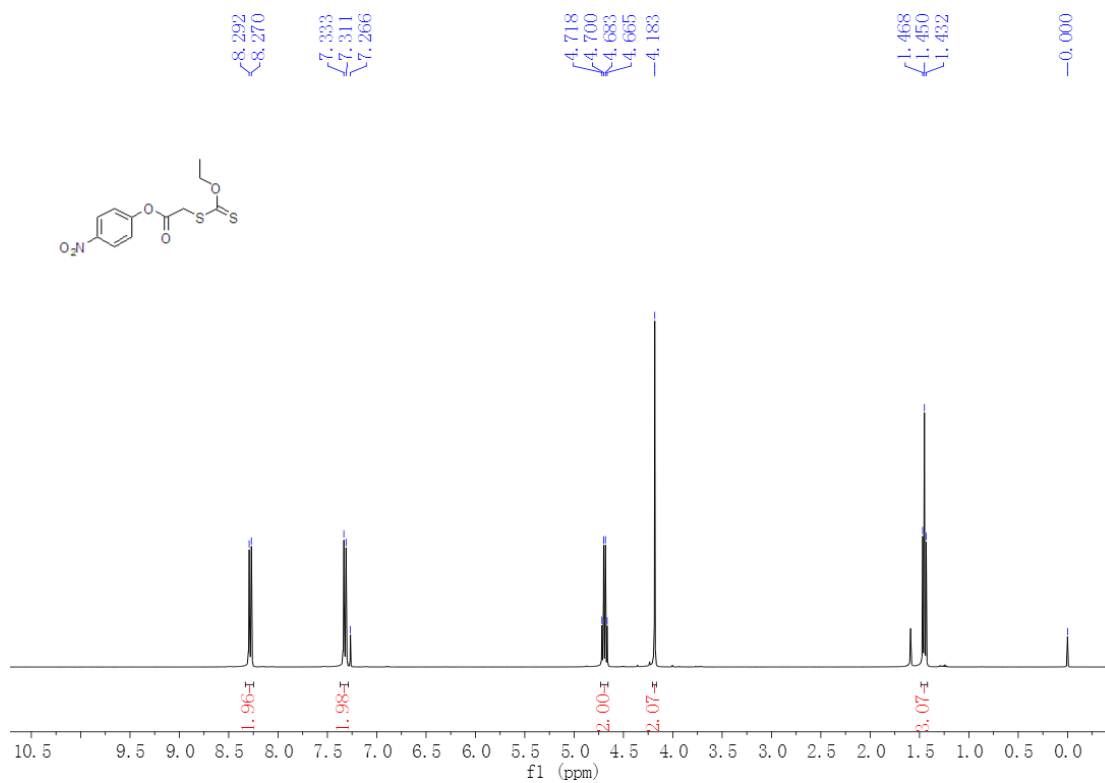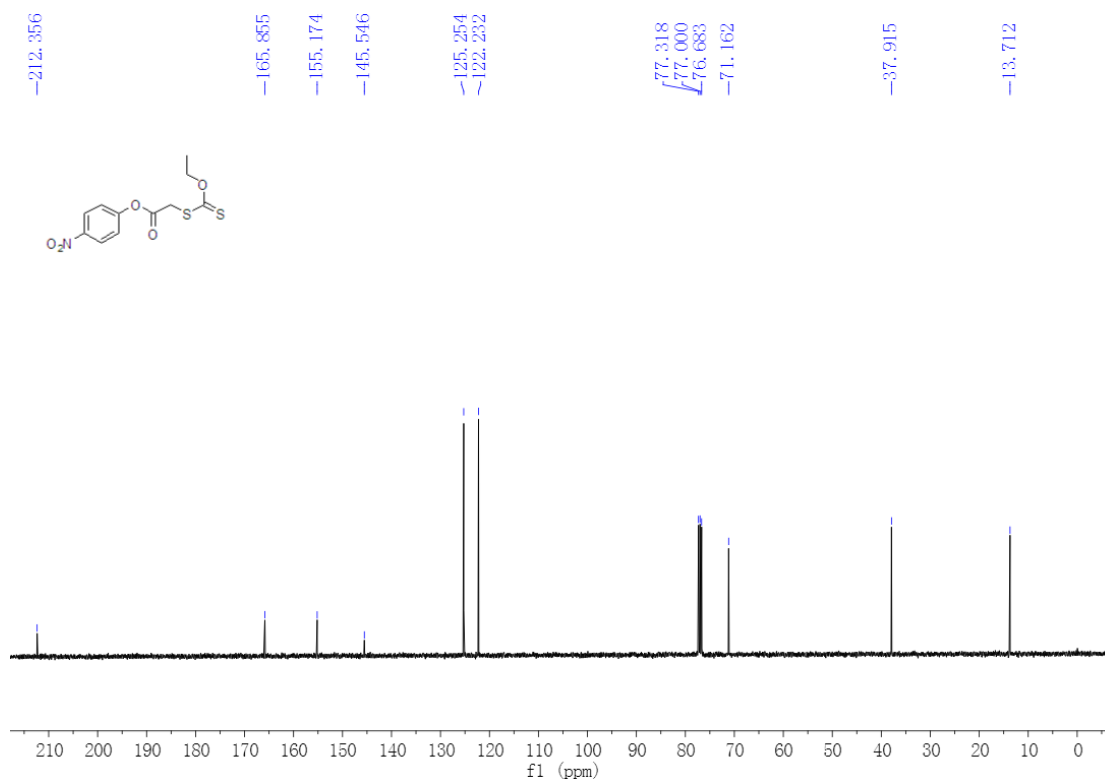

***S*-(2-Benzoyloxy-2-oxoethyl) *O*-ethyl carbonodithioate (1i)**

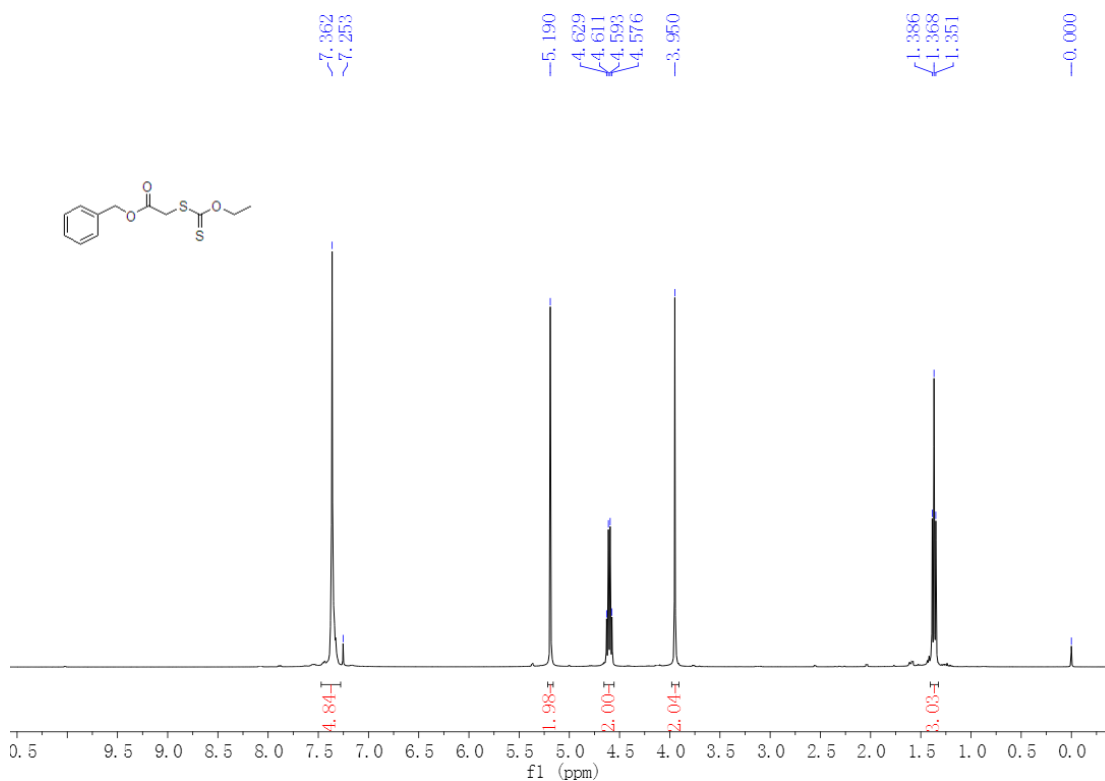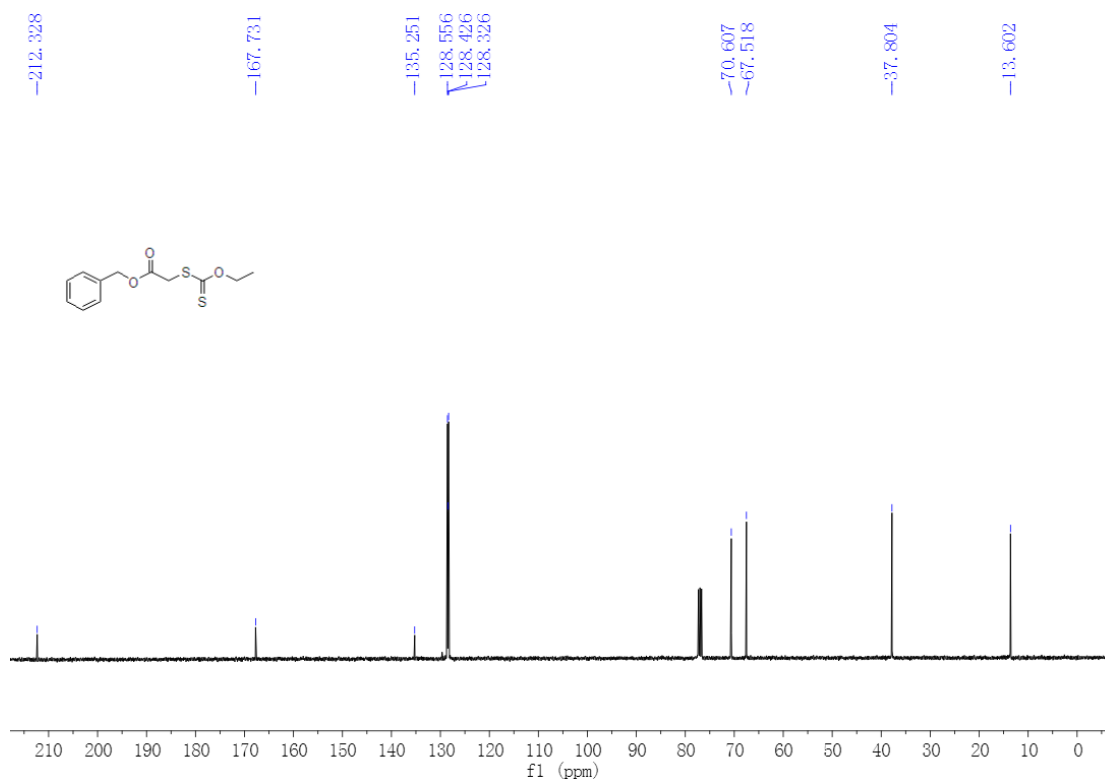

**S-(2-Diphenylamino-2-oxoethyl) O-ethyl carbonodithioate (1j)**

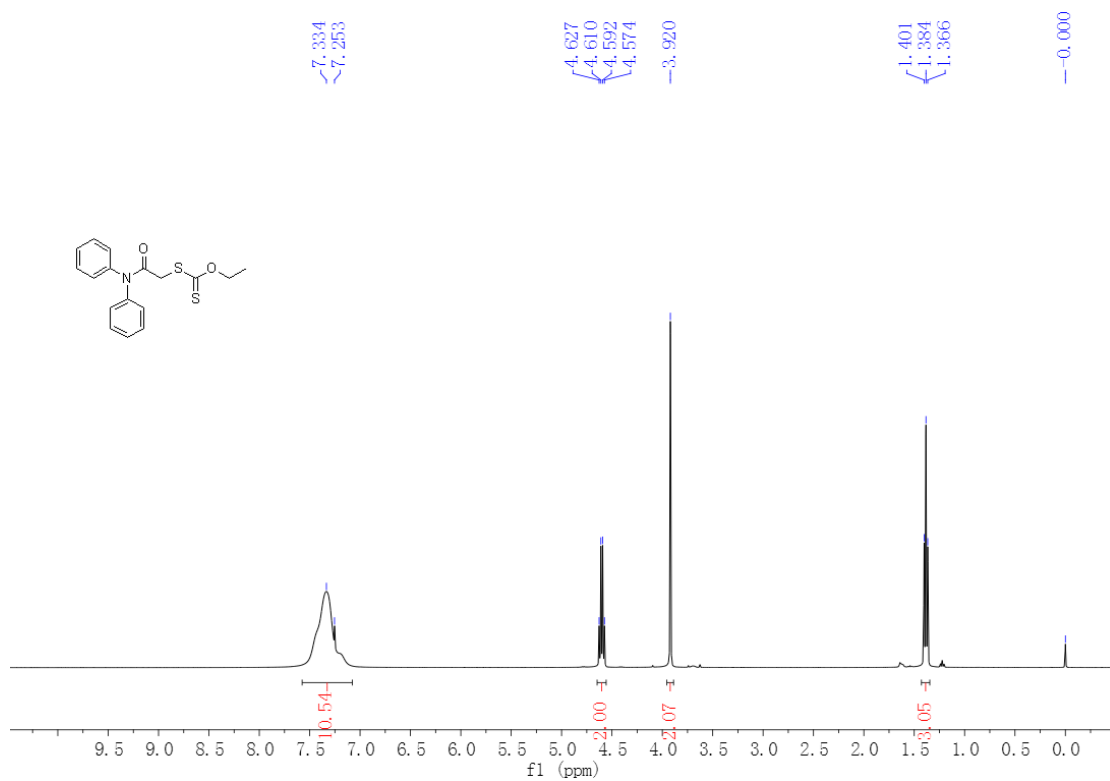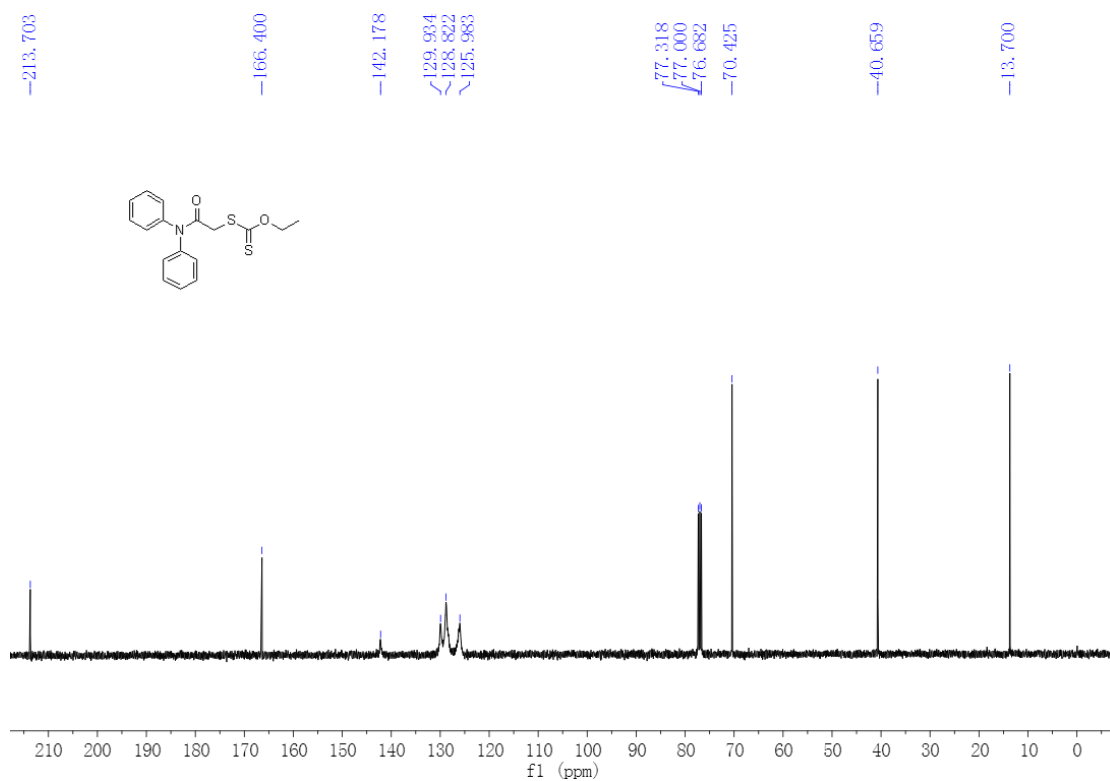



***O*-Ethyl *S*-[2-(methanesulfonylphenylamino)-2-oxoethyl] carbonodithioate (1k)**

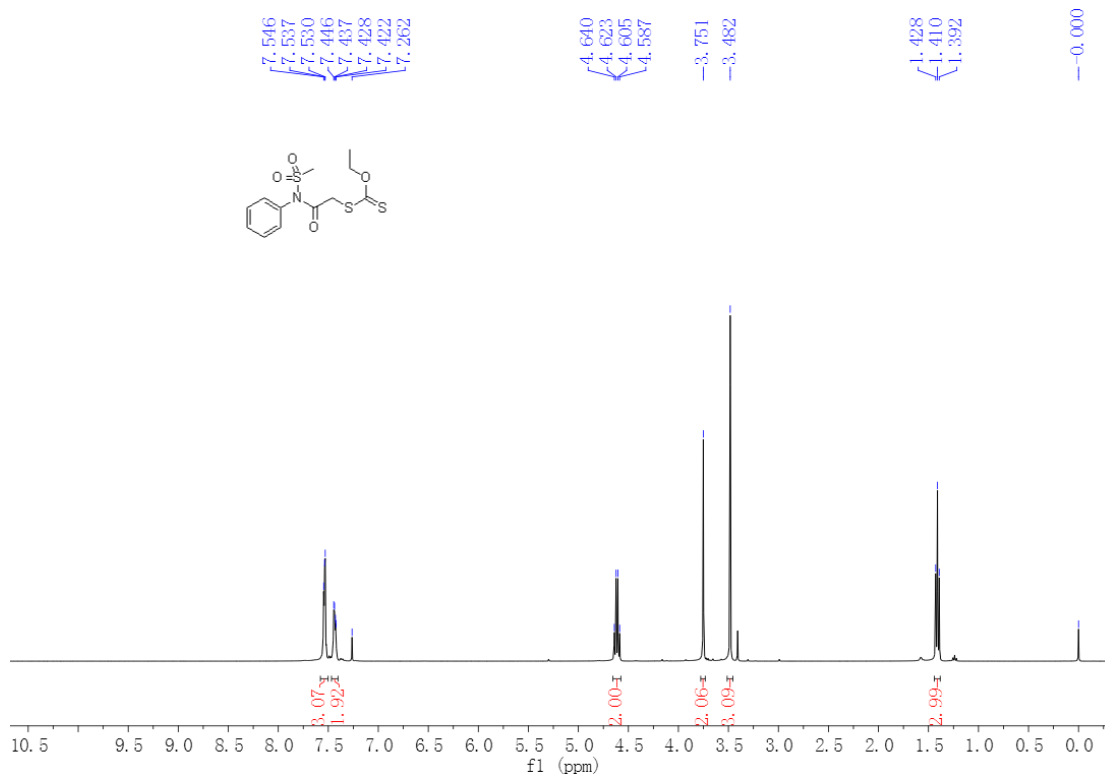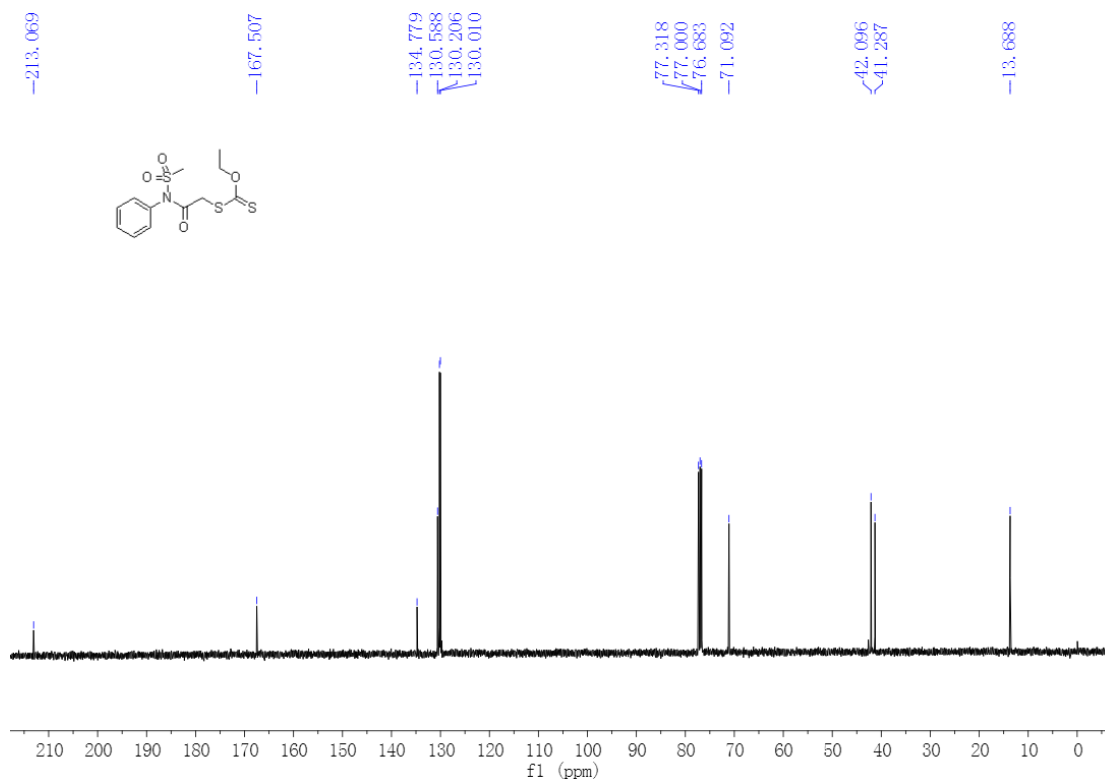

## Copies of $^1\text{H}$ and $^{13}\text{C}$ NMR spectra of unknown allylbutylsulfoxide 2d

### Allylbutylsulfoxide (2d)

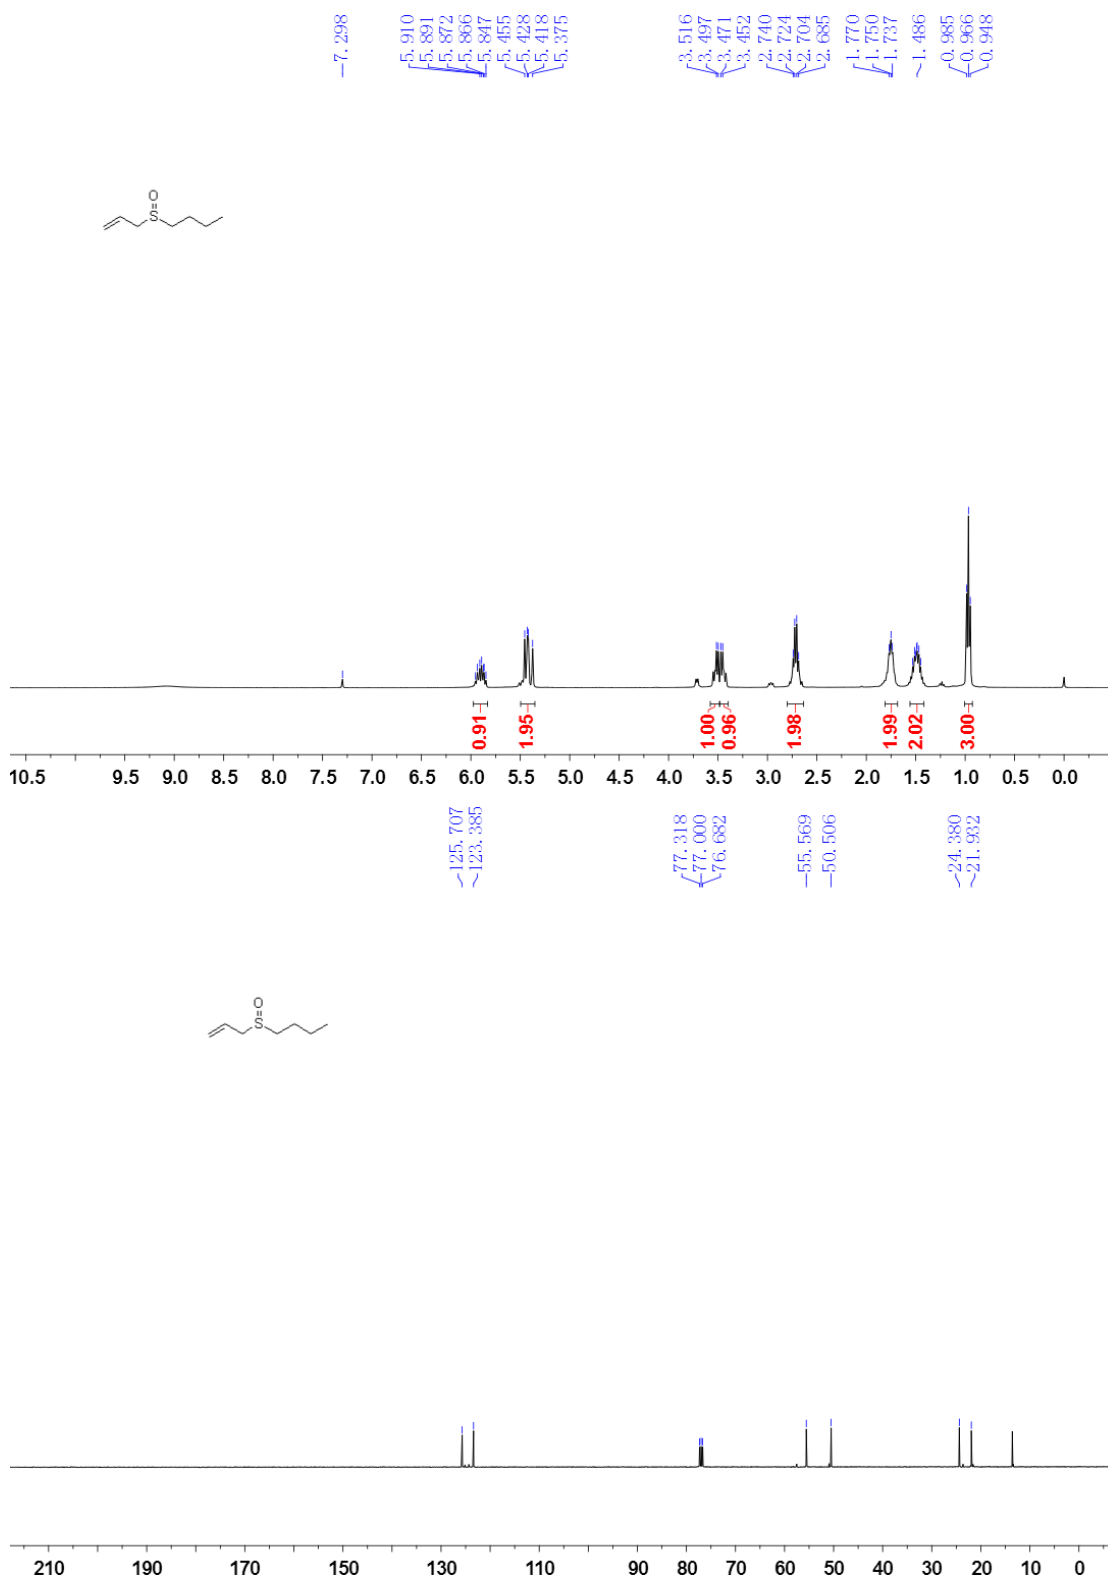

### Copies of $^1\text{H}$ and $^{13}\text{C}$ NMR spectra of symmetric 1,7-dicarbonyl compounds 3

#### *S*-(1,7-Dioxo-1,7-diphenylheptan)-4-yl *O*-ethyl carbonodithioate (3a)

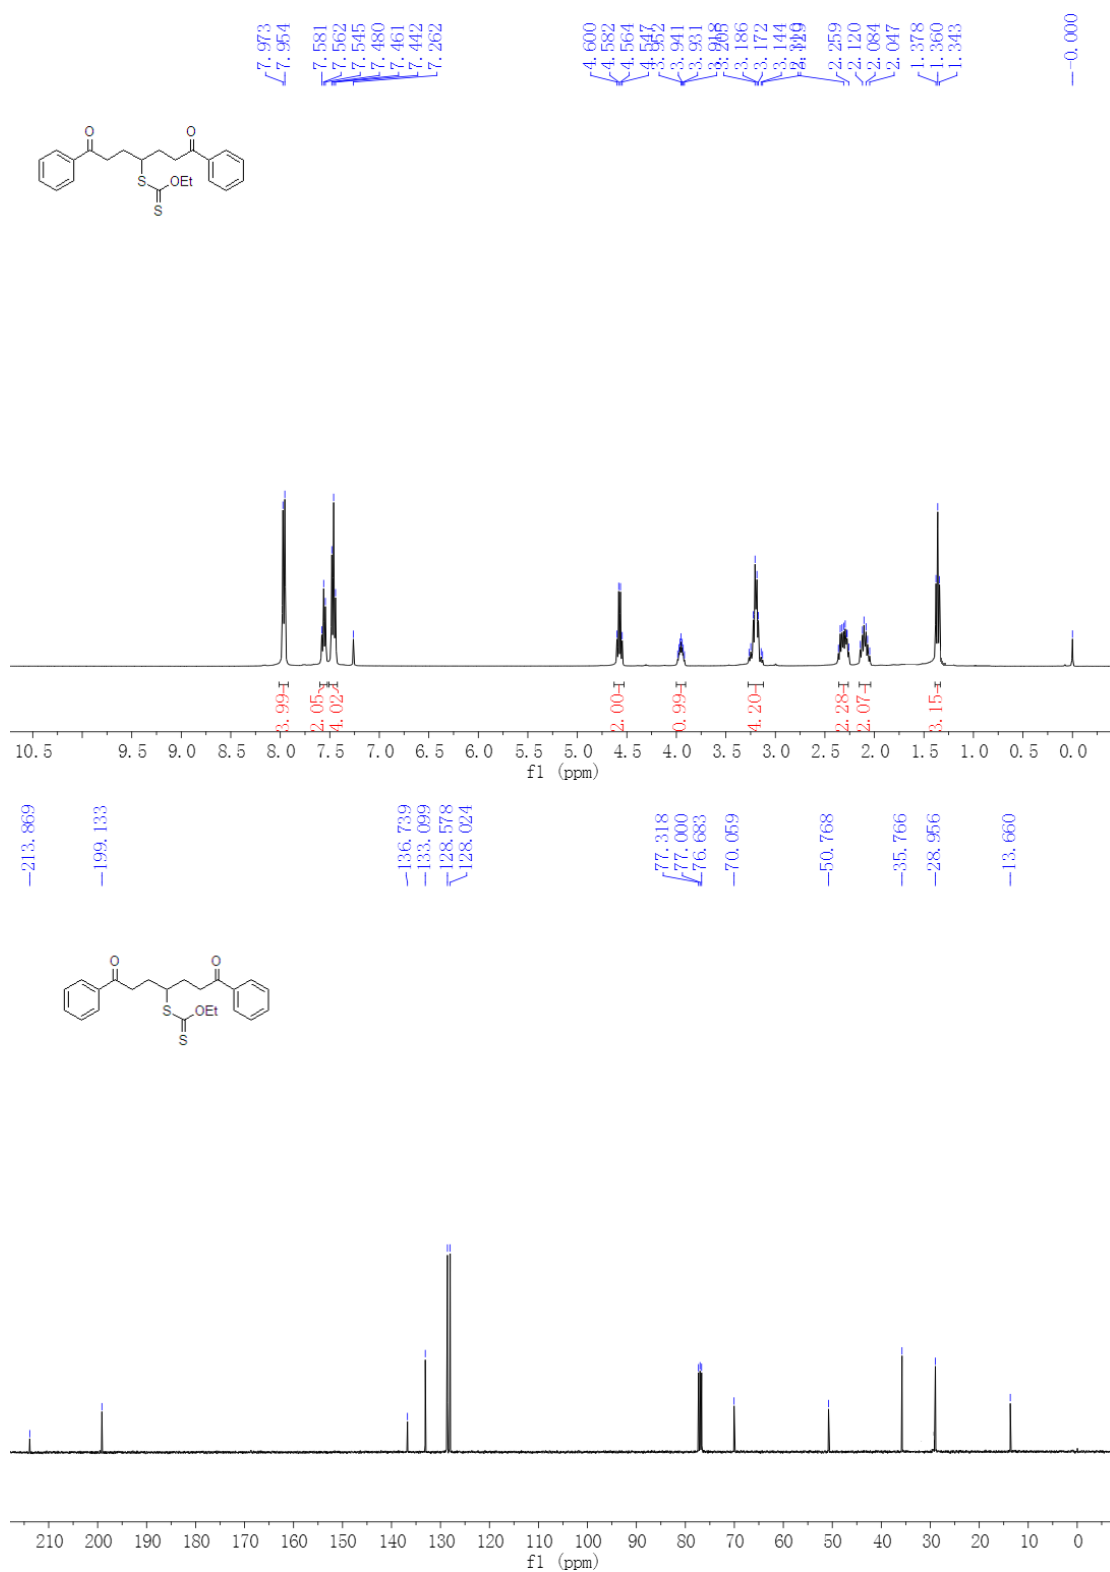

***S*-[1,7-Dioxo-1,7-di (4-methoxyphenyl)heptan]-4-yl *O*-ethyl carbonodithioate (3b)**

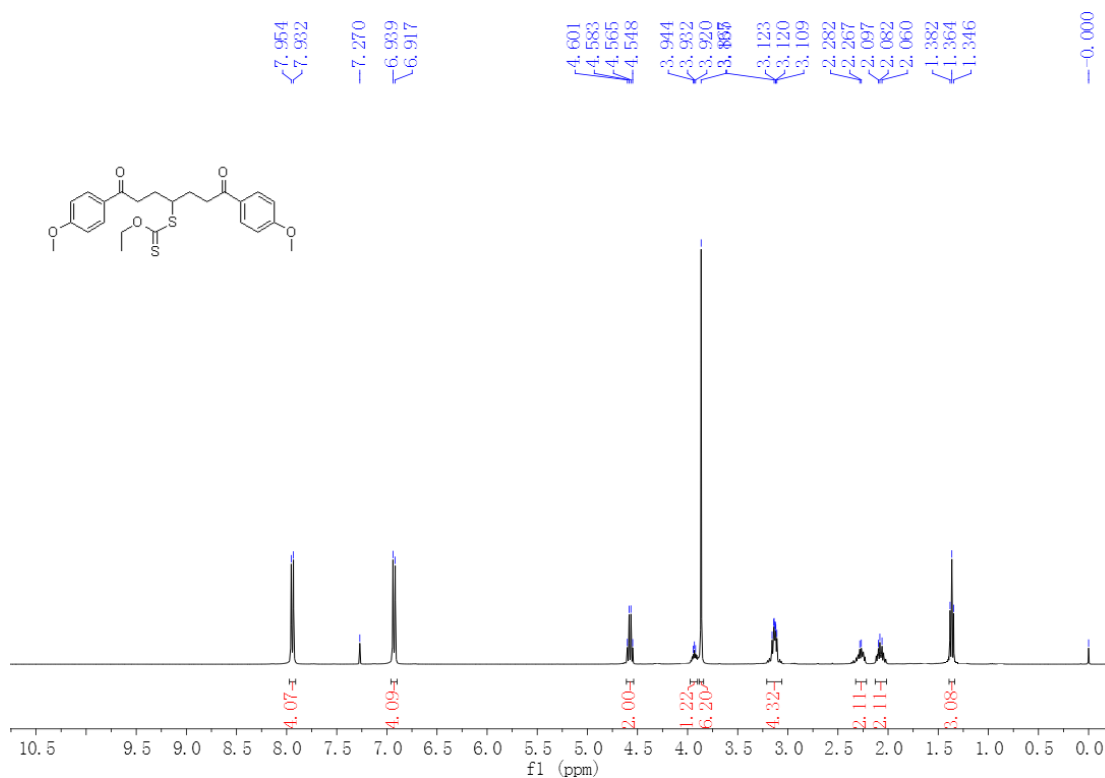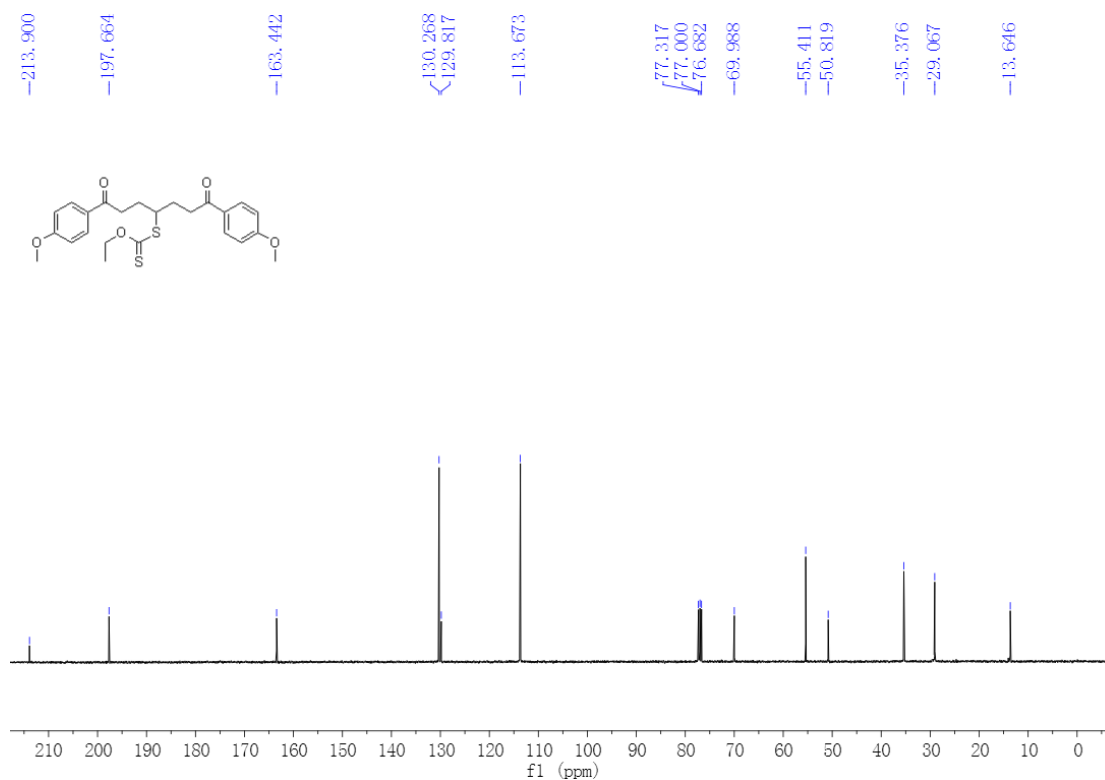

**S-(1,7-Dioxononan)-5-yl O-ethyl carbonodithioate (3c)**

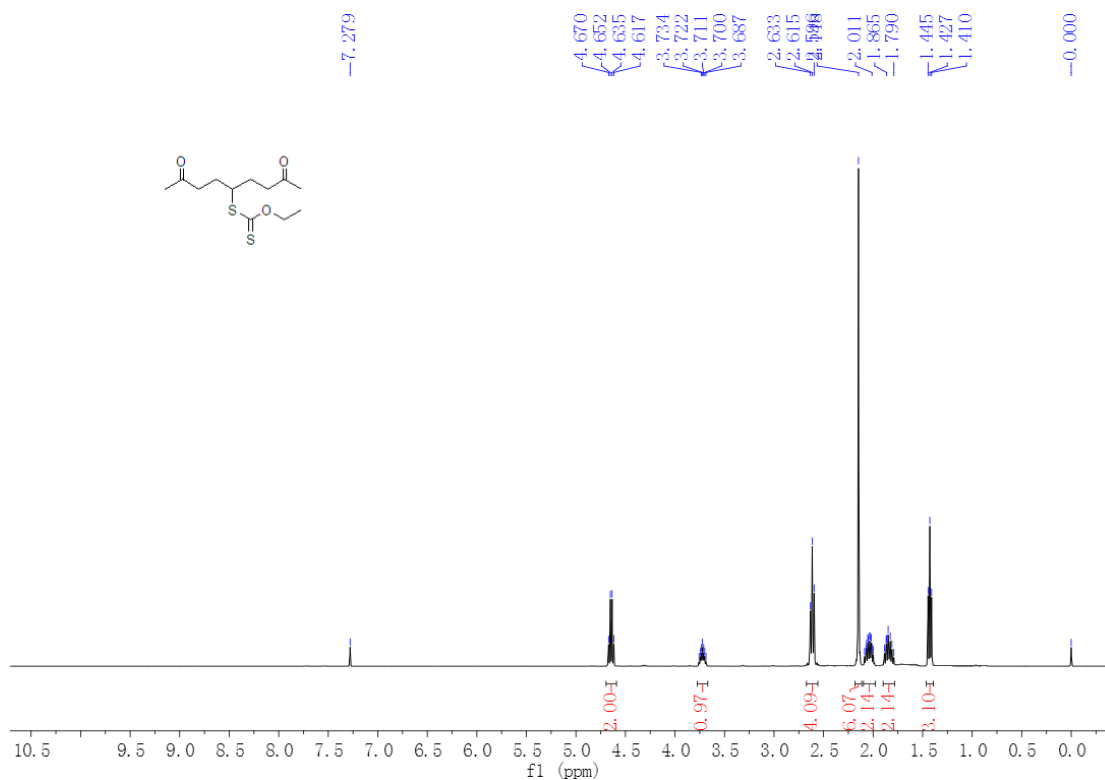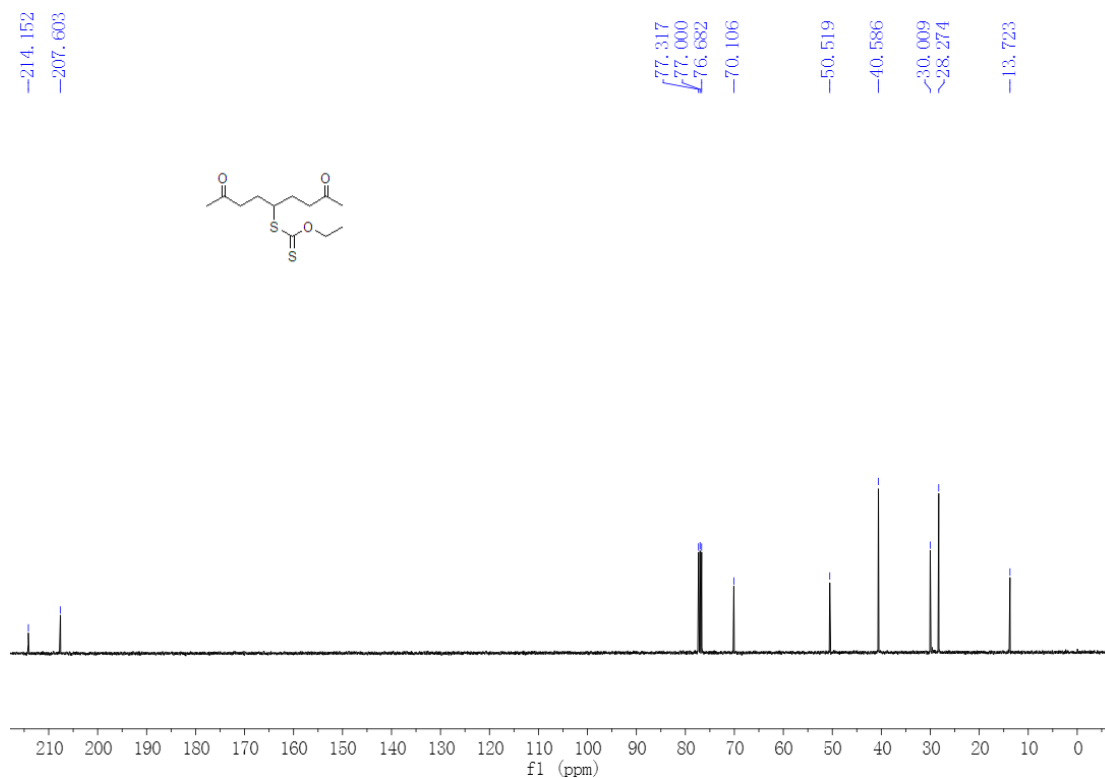

***S*-(1,7-Dichloro-1,7-dioxononan)-5-yl *O*-ethyl carbonodithioate (3d)**

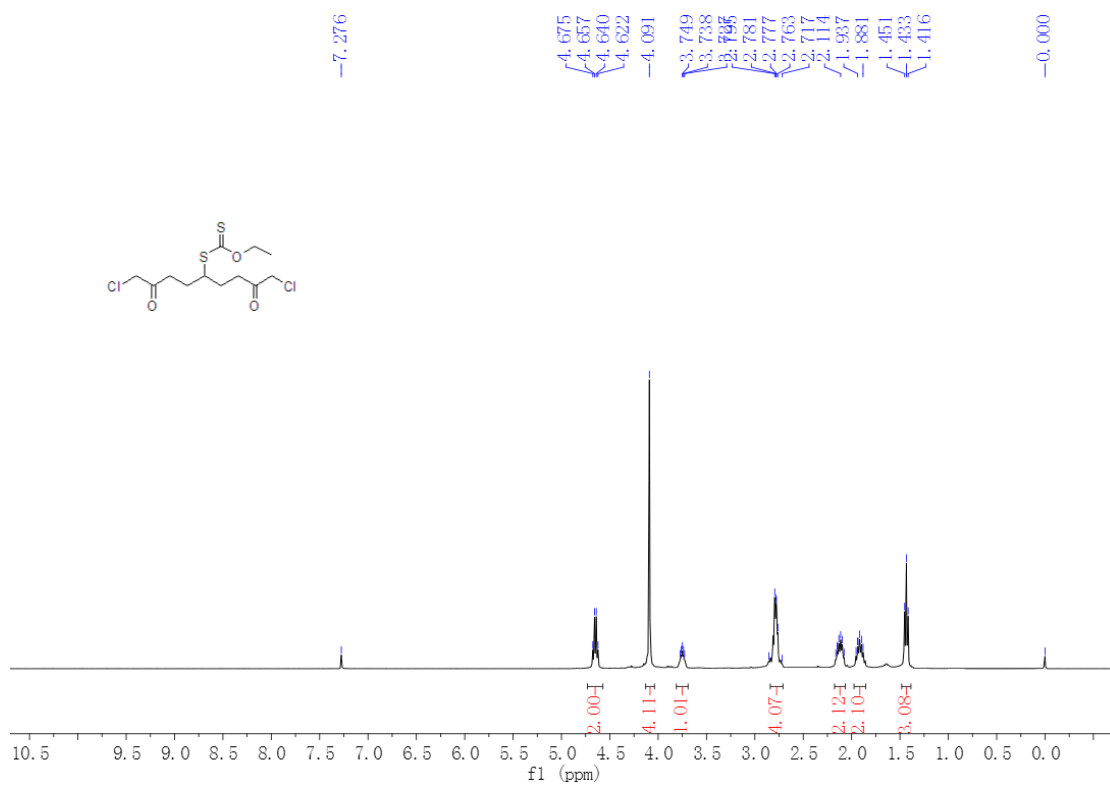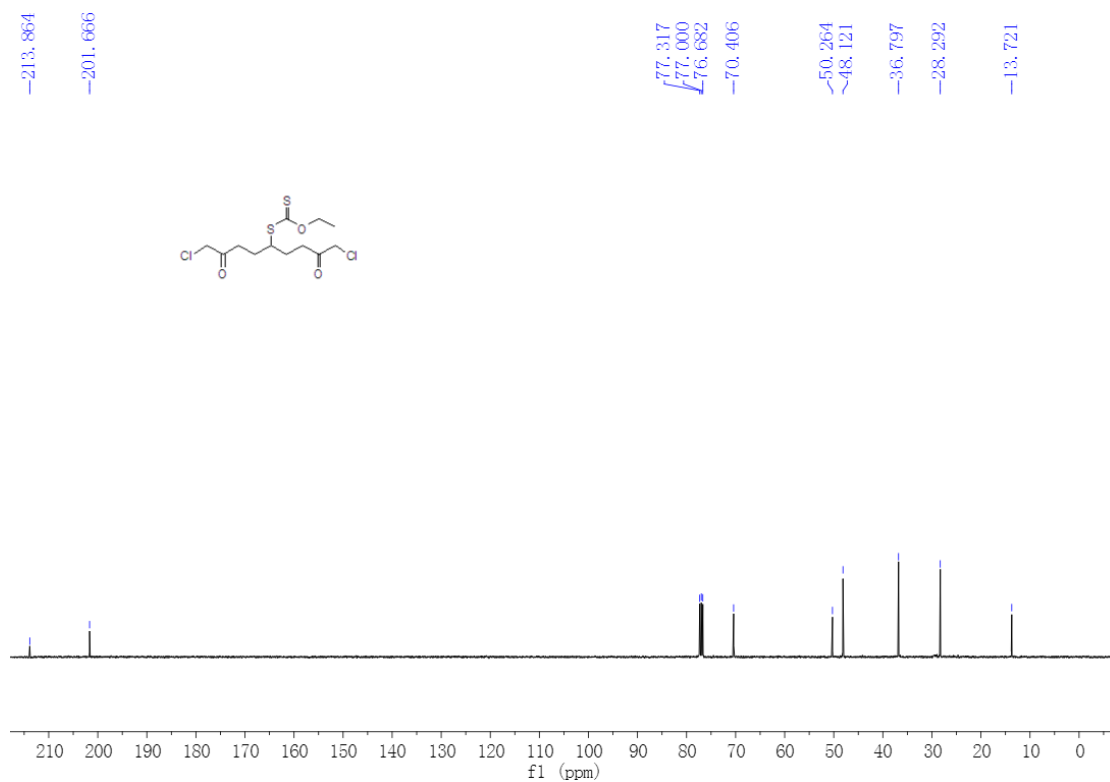

**S-(1,7-Diethoxyl-1,7-dioxoheptan)-4-yl O-ethyl carbonodithioate (3e)**

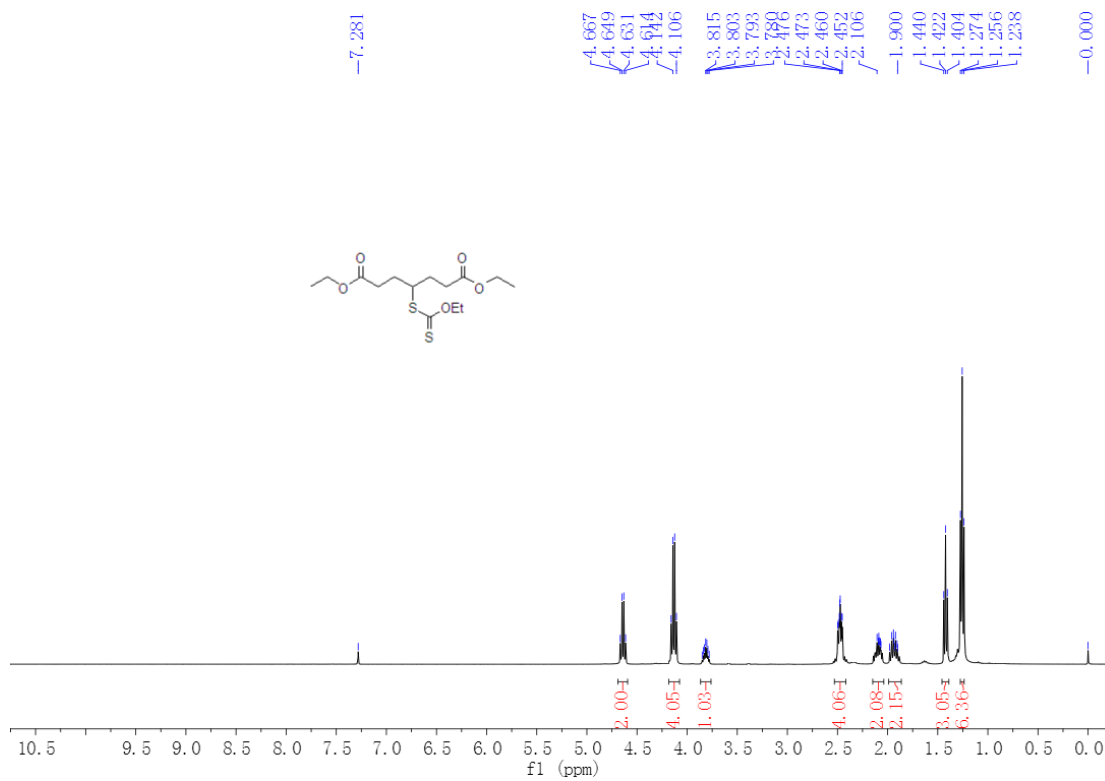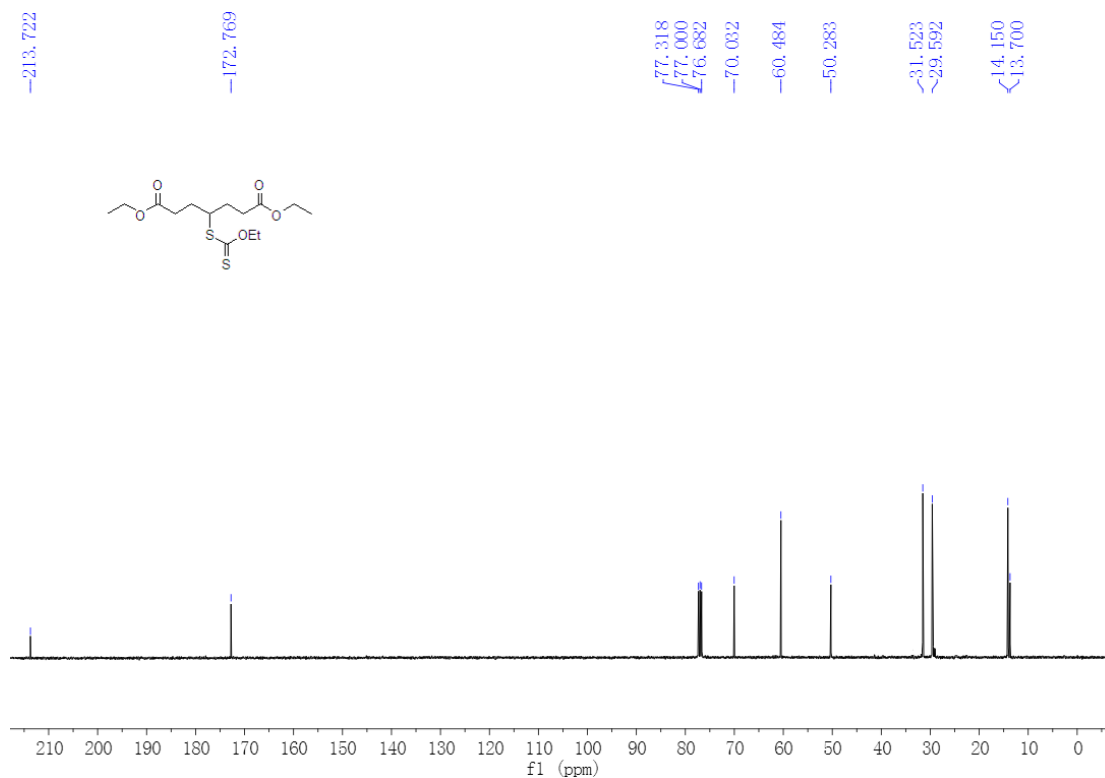

### *S*-(1,7-Dioxo-1,7-diphenoxyheptan)-4-yl *O*-ethyl carbonodithioate (3f)

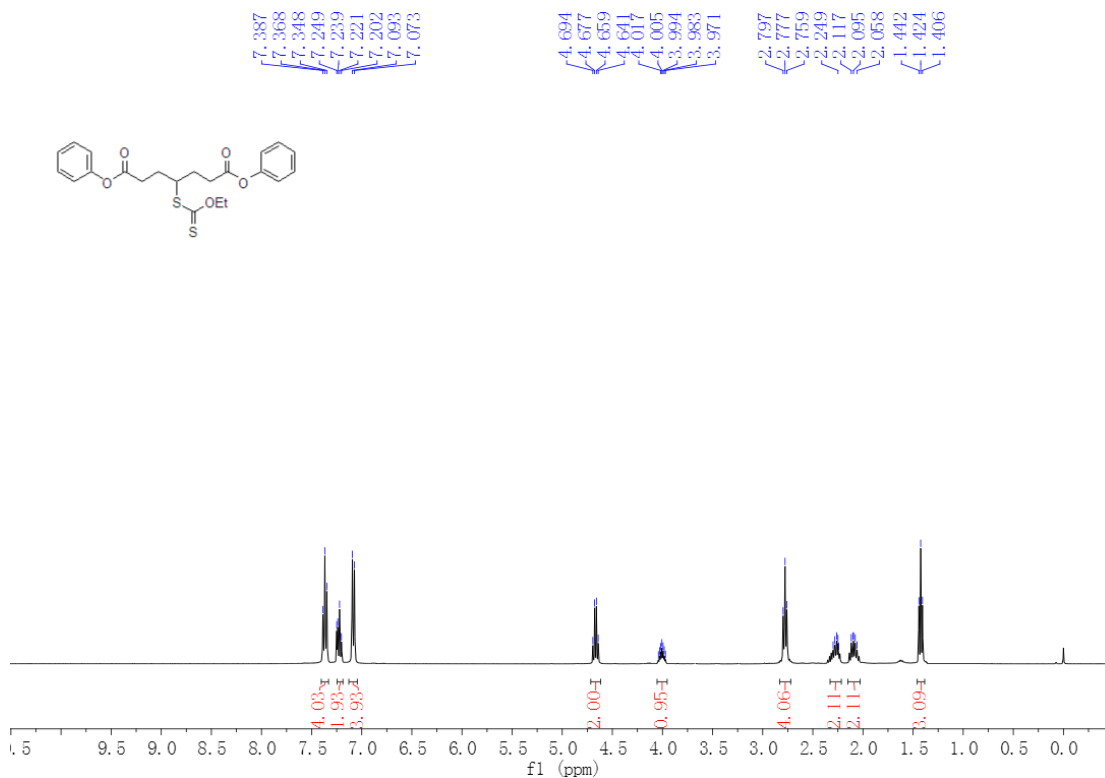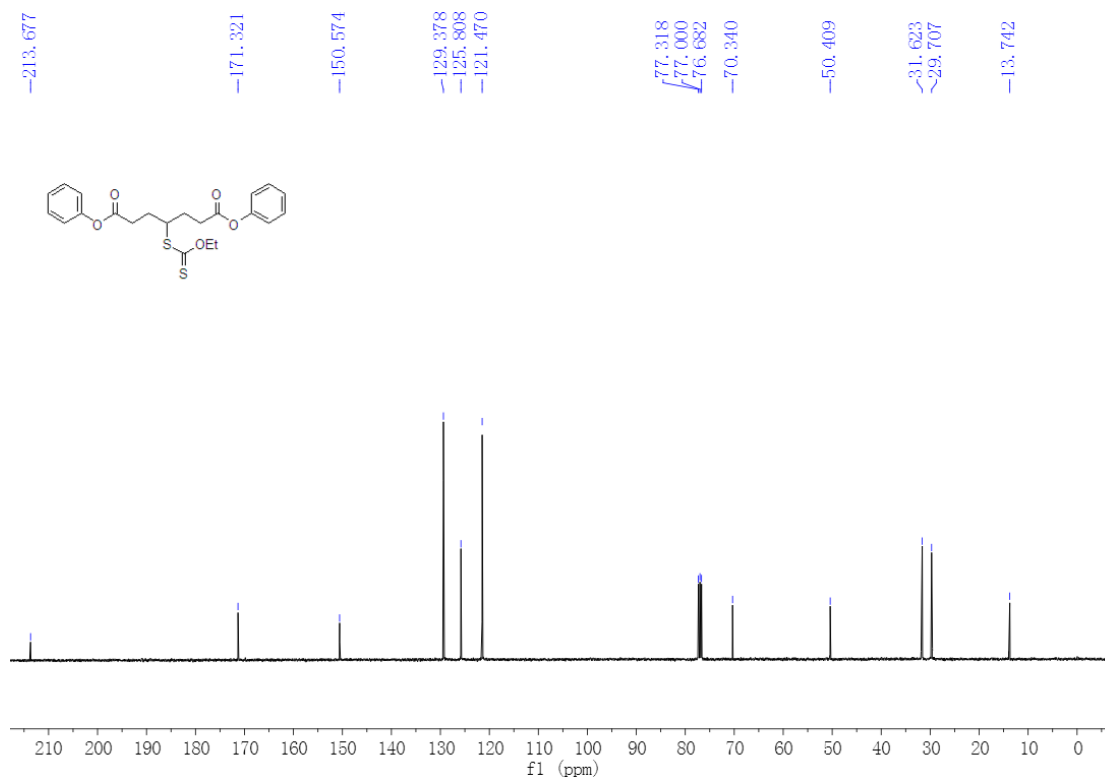



**S-[1,7-Di(4-chloro-phenoxy)-1,7-dioxoheptan]-4-yl O-ethyl carbonodithioate (3g)**

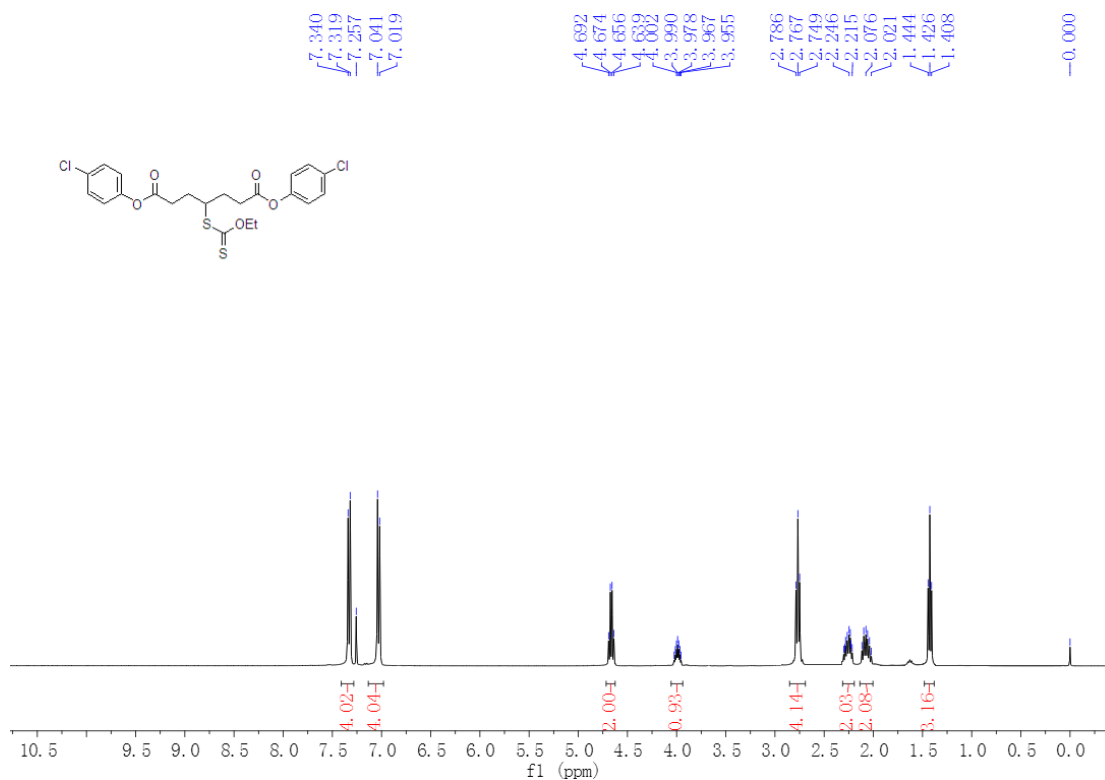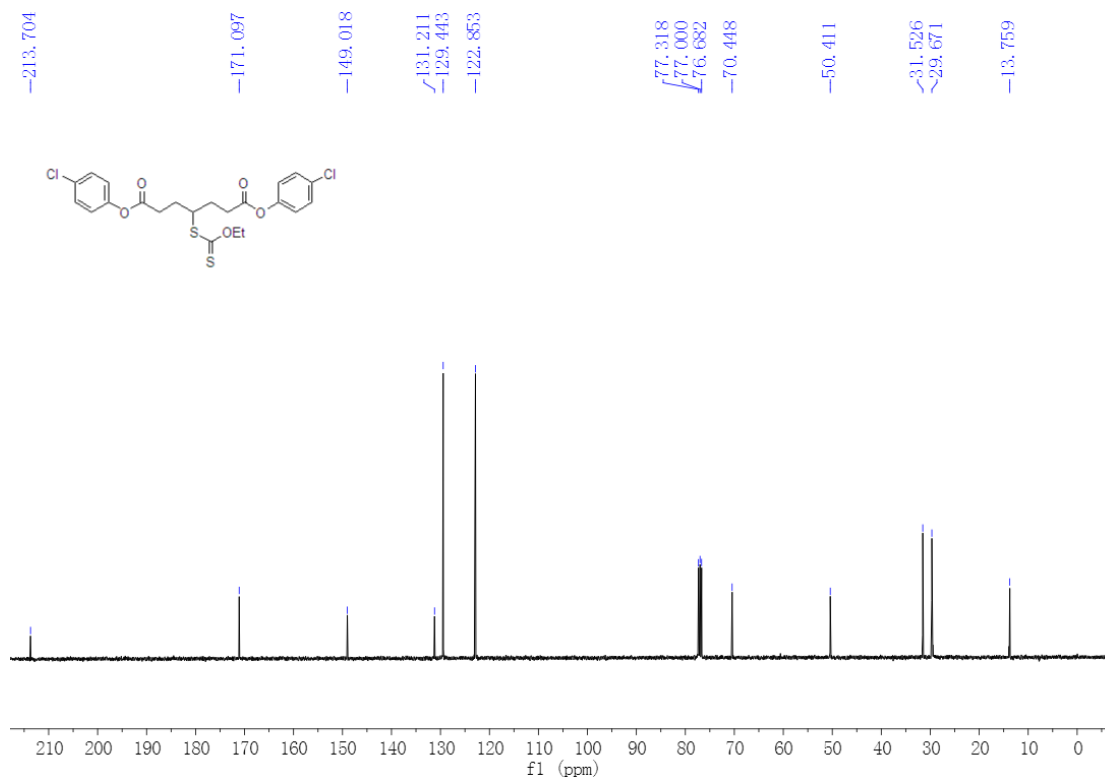

**S-[1,7-Di(4-nitro-phenoxy)-1,7-dioxoheptan]-4-yl O-ethyl carbonodithioate (3h)**

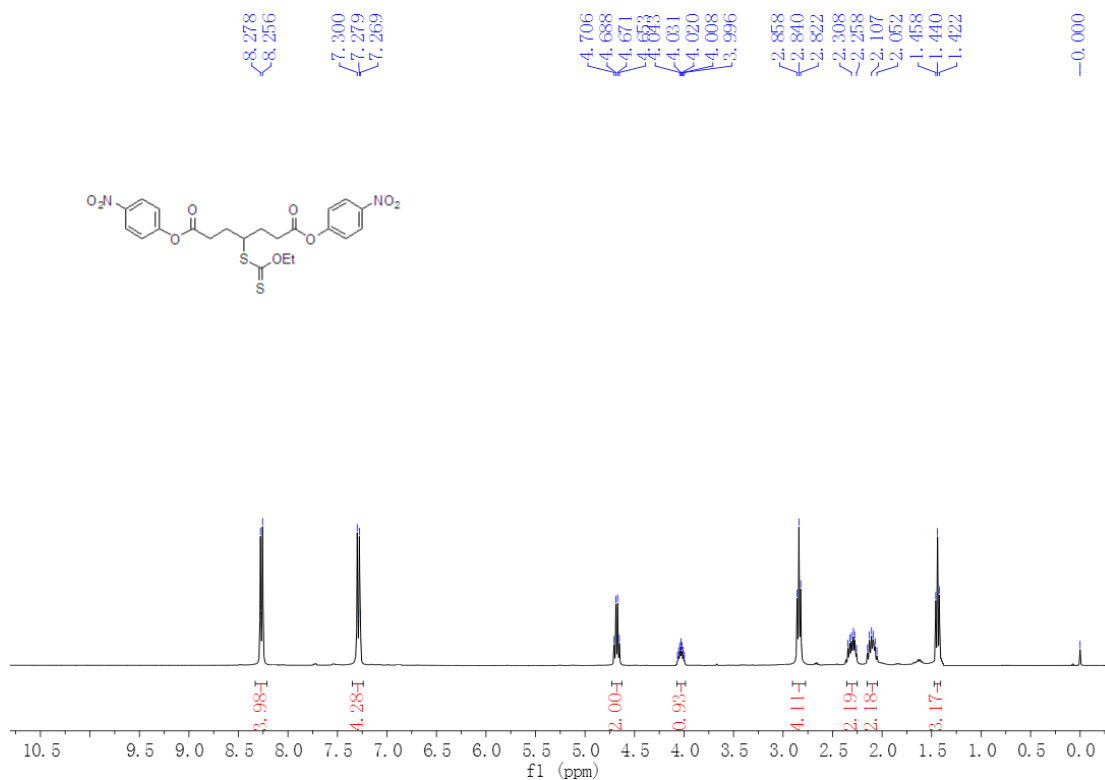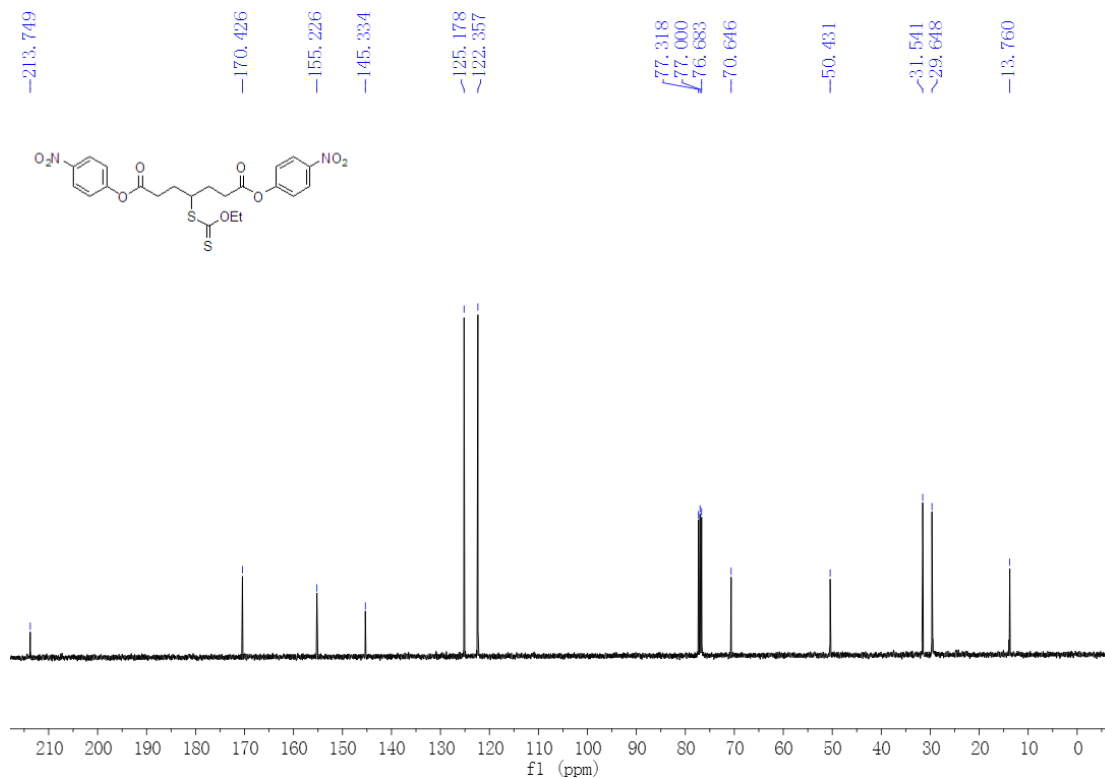

***S*-(1,7-Dibenzyloxy-1,7-dioxoheptan)-4-yl *O*-ethyl carbonodithioate (3i)**

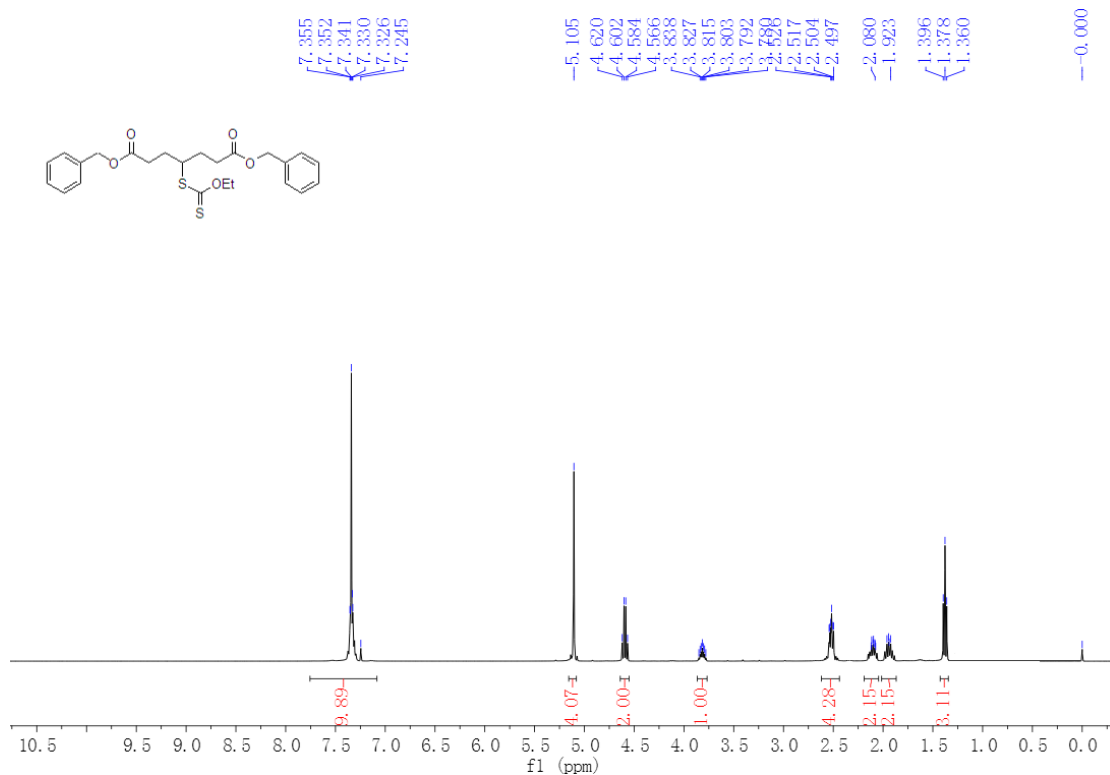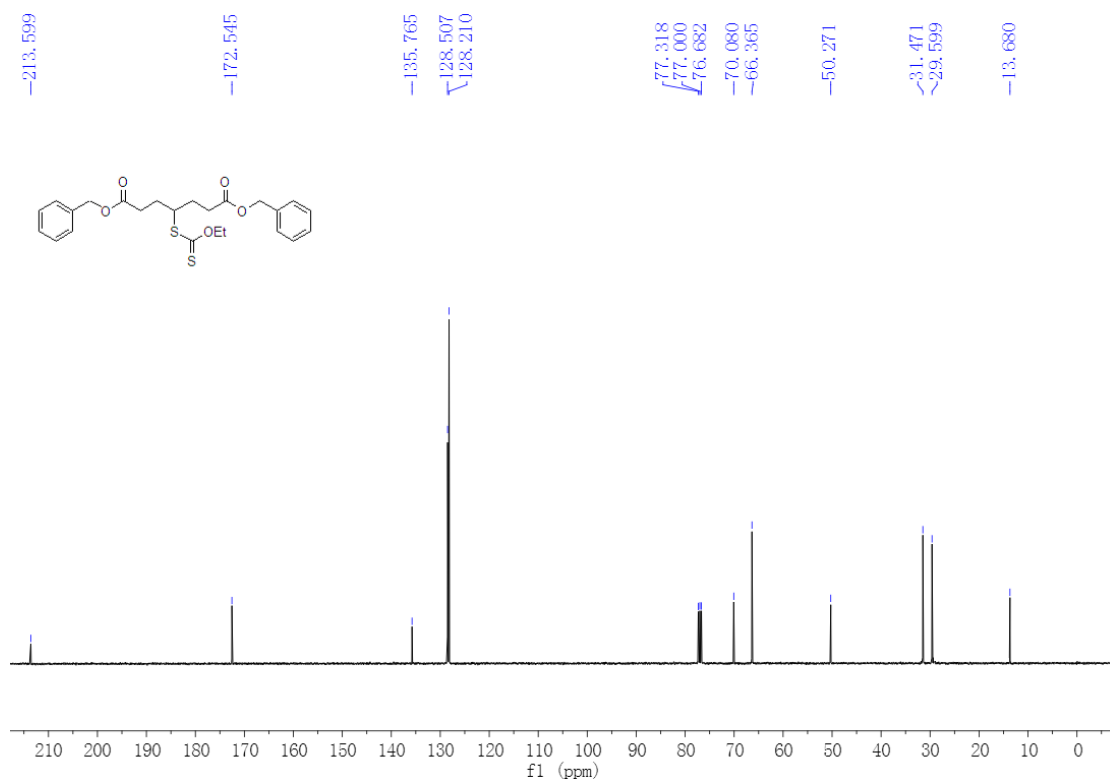

**S-{[1,7-Di(diphenylamino)-1,7-dioxo]heptan}-4-yl O-ethyl carbonodithioate (3j)**

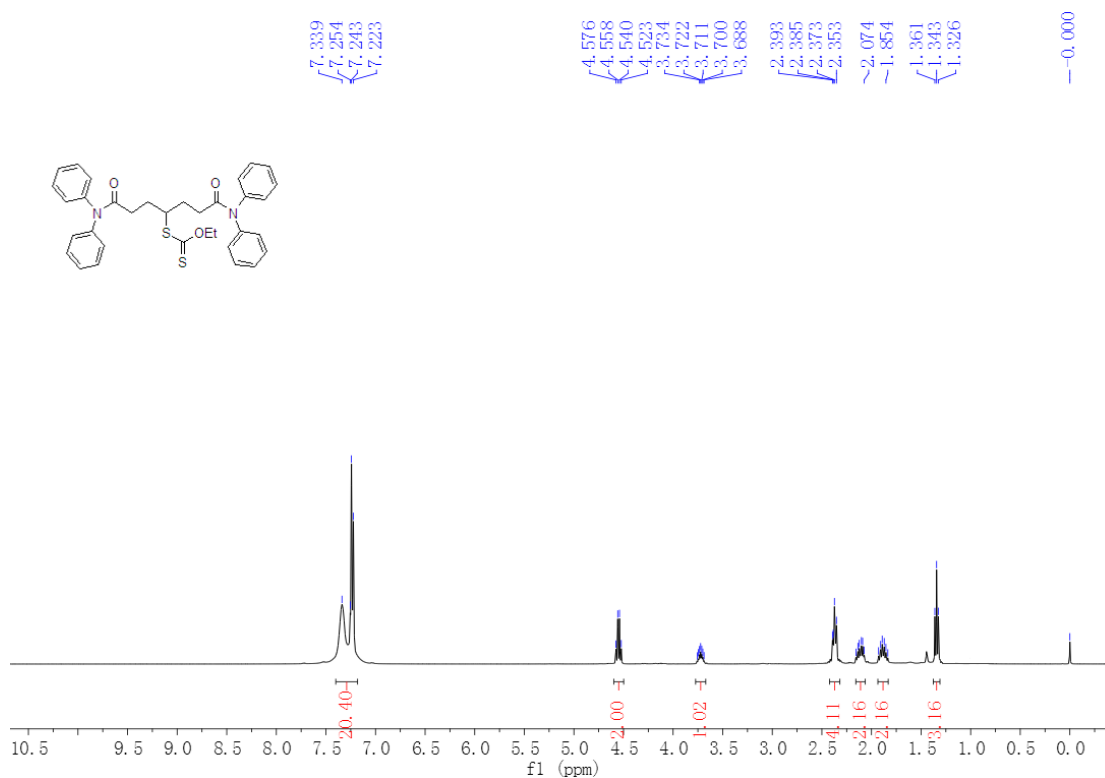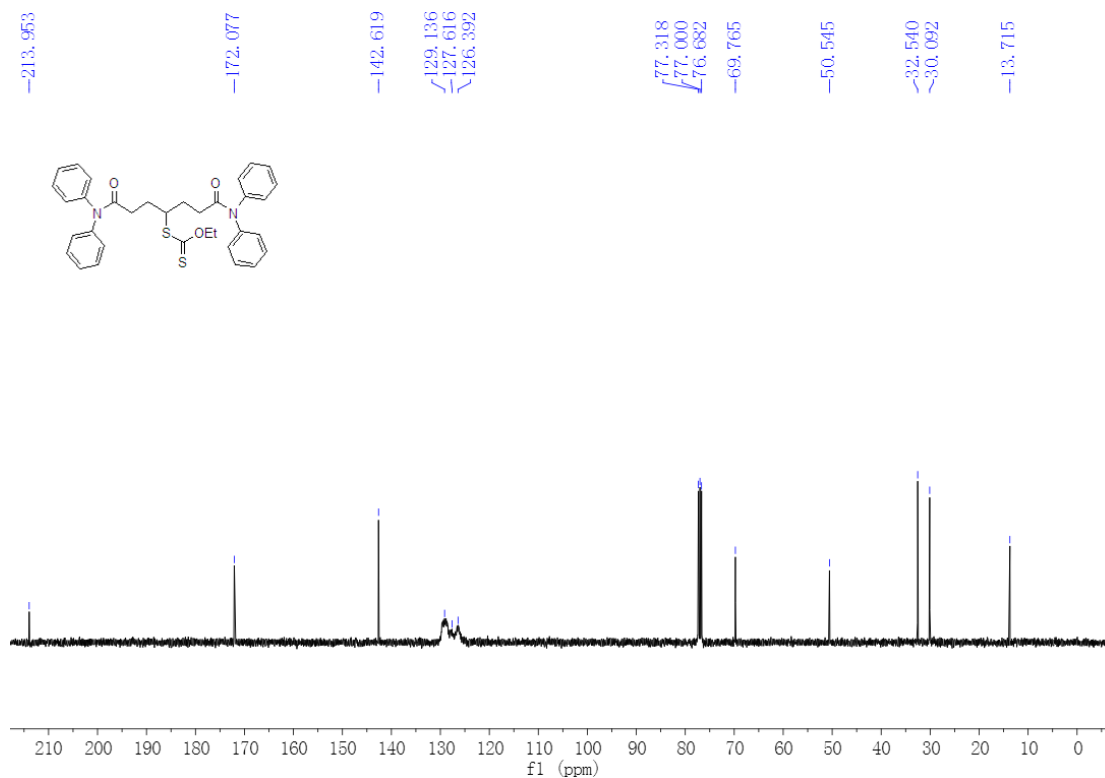



**S-[1,7-Dioxo-1,7-di(2-oxooxazolidin-3-yl)heptan]-4-yl O-ethyl carbonodithioate**

**(31)**

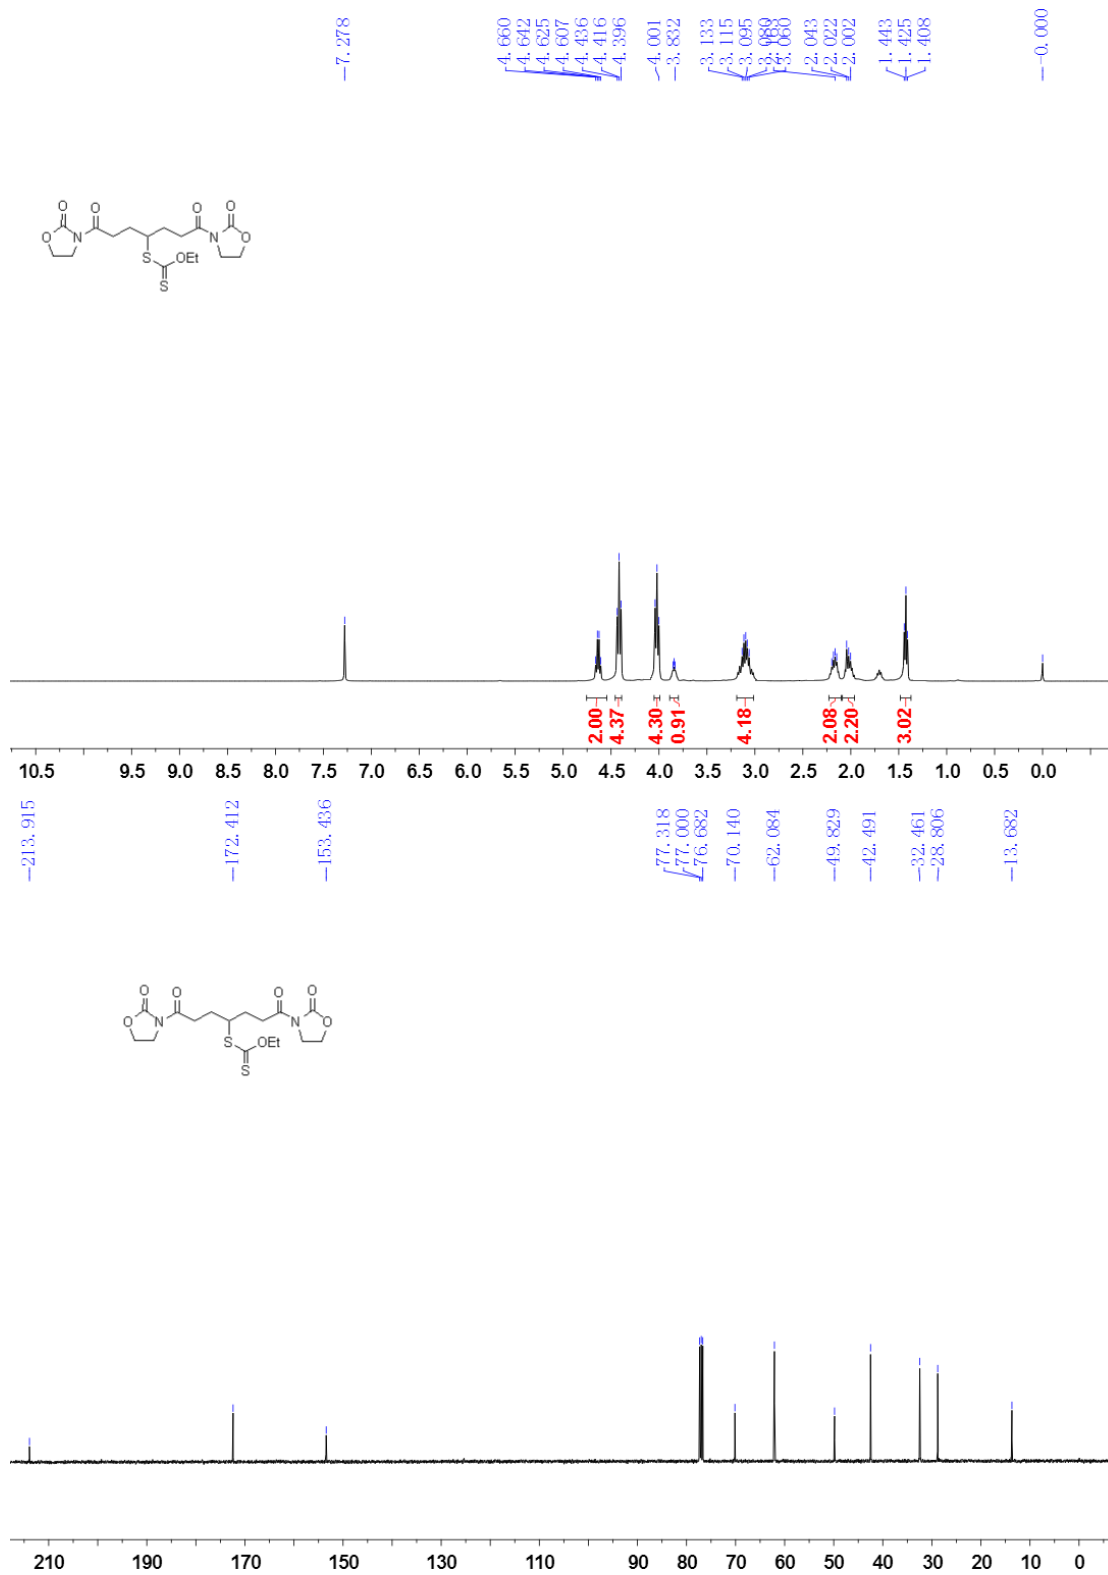

### *S*-(1,5-Dicyanopentan-3-yl) *O*-ethyl carbonodithioate (**3m**)

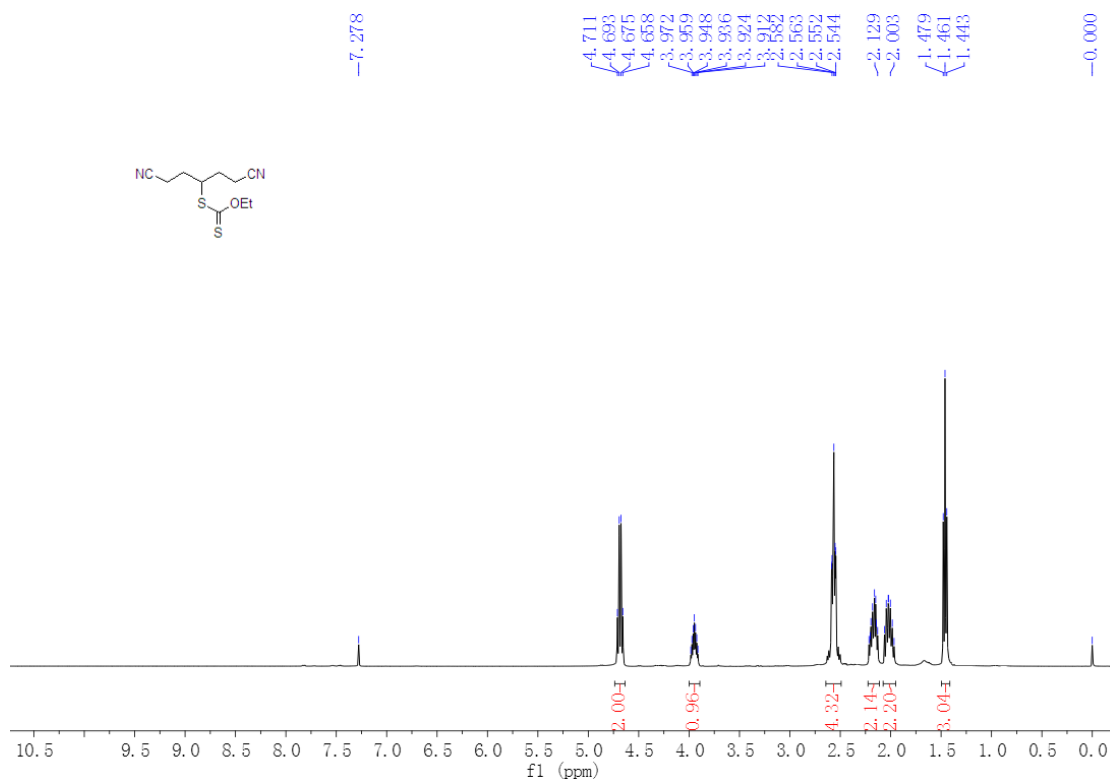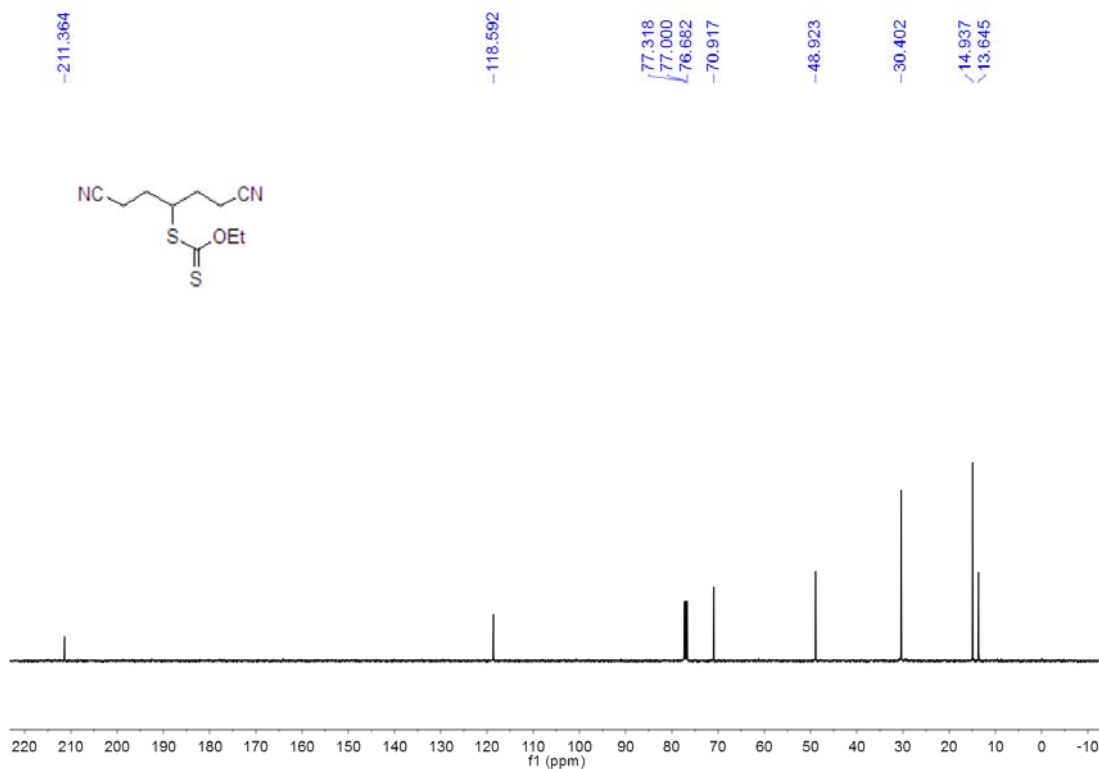

Supplement: c3ra42932f.pdf [file c3ra42932f.pdf]
